# Supplementary material for: Comprehensive Analysis of Secondary Metabolites in Usnea longissima (Lichenized Ascomycetes, Parmeliaceae) Using UPLC-ESI-QTOF-MS/MS and Pro-Apoptotic Activity of Barbatic Acid
Source: PubMed Central journal article supplement (PMC6630668; doi:10.3390/molecules24122270), 2019-06-18
Supplement: molecules-24-02270-s001.pdf [file molecules-24-02270-s001.pdf]

## Supplementary materials

### Comprehensive Analysis of Secondary Metabolites in *Usnea longissima* (Lichenized Ascomycetes, Parmeliaceae) Using UPLC-ESI-QTOF-MS/MS and Pro-Apoptotic Activity of Barbatic Acid

S. Divya Reddy <sup>1,2</sup>, Bandi Siva <sup>1</sup>, Katragunta Kumar <sup>1</sup>, V. S. Phani Babu <sup>3</sup>, Vemireddy Sravanthi <sup>4</sup>, Joel Boustie <sup>5,\*</sup>, V. Lakshma Nayak <sup>6</sup>, Ashok K Tiwari <sup>1</sup>, CH. V. Rao <sup>7</sup>, B. Sridhar <sup>8</sup>, P. Shashikala <sup>2</sup> and K. Suresh Babu <sup>1,\*</sup>

<sup>1</sup> Centre for Natural Products & Traditional Knowledge, CSIR-Indian Institute of Chemical Technology, Tarnaka, Hyderabad 500 007, Telangana, India

<sup>2</sup> Dept. of Pharmacy, University College of Technology, Osmania University, Hyderabad-500 007, Telangana, India

<sup>3</sup> Centre for NMR & Structural Chemistry, CSIR-Indian Institute of Chemical Technology, Hyderabad 500 007, Telangana, India

<sup>4</sup> Organic Synthesis and Process Chemistry Division, CSIR-Indian Institute of Chemical Technology, Hyderabad 500 007, Telangana, India

<sup>5</sup> Univ Rennes, CNRS, ISCR (Institut des Sciences Chimiques de Rennes) - UMR 6226, F-35000 Rennes, France

<sup>6</sup> Division of Applied Biology, CSIR-Indian Institute of Chemical Technology, Tarnaka, Hyderabad-500 007, Telangana, India

<sup>7</sup> Pharmacognosy and Ethnopharmacology Division, CSIR-National Botanical Research Institute Rana Pratap Marg, P.O. Box No. 436, Lucknow 226001, Uttar Pradesh, India

<sup>8</sup> Analytical Division, CSIR-Indian Institute of Chemical Technology, Tarnaka, Hyderabad-500 007, Telangana, India

\* Correspondence: joel.boustie@univ-rennes1.fr (J.B.); suresh@iict.res.in (K.S.B.); Tel: +91-40-27191881 (K.S.B.); Fax: +91-40-27160512 (K.S.B.)

**Identification of *U. longissima*:**

Microscopic study showed *Usnea longissima* is pale greenish or silvery-yellowish-green, fruticose and pendulous; main branches are cylindrical, up to 3 meters or more in length and very rarely dividing, with numerous dense, short perpendicular side branches and fibrils of about equal length (3-40 mm). The cortex is smooth but disintegrating on the main stems, leaving rough patches of white medulla over the pinkish-to-brownish central cord. The unexposed central cord beneath the cortex is white (when exposed with a razor blade), but frequently turns pinkish or reddish brown in decorticate main branches.

Central cord I+B. Cortex and medulla K-, C-, KC- PD- (with various combinations of evernic, diffractaic, barbatic, and 4-O-demethylbarbatic acids; sometimes with usnic acid only), rarely K+Y-O, PD+O (salazinic acid).

*Usnea longissima* is distinguished from other *Usnea* species by the extremely long, mostly unbranched main strands, which have perpendicular side branches and fibrils, and a patchy surface due to the eroded cortex. Small specimens may be confused with other pendant *Usnea* species, but only *U. longissima* has a I+ violet or dark bluish central cord and eroding cortex.

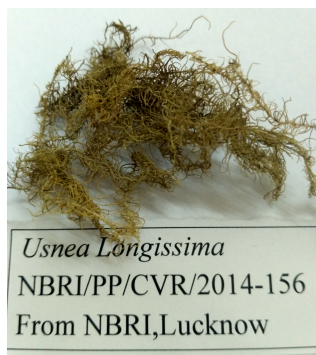

**Figure S1.** *Usnea longissima* lichen specimen.

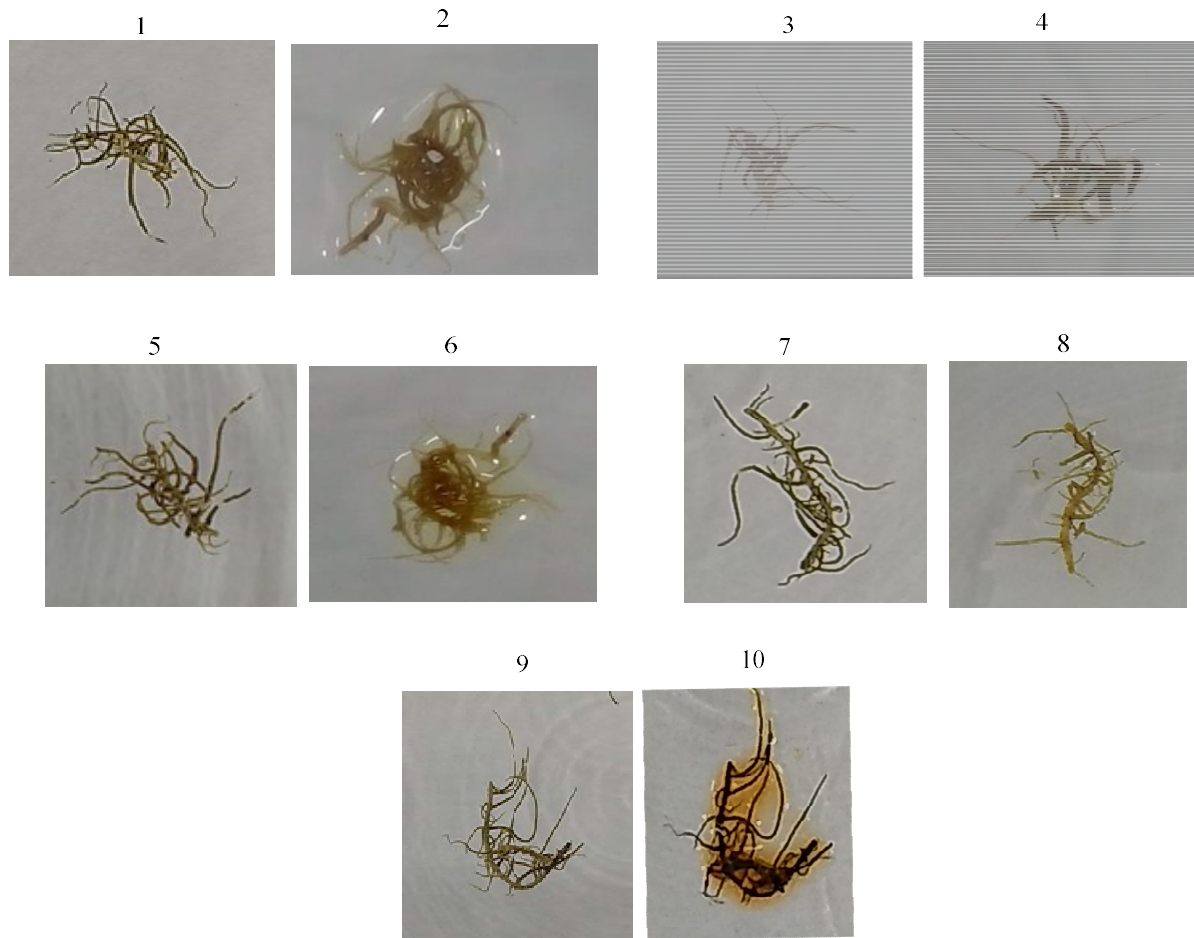

**Figure S2.** *U. longissima* spot tests for identification (1, 3, 5, 7, 9 = authentic *Usnea longissima*; 2 = after K test, 4 = after C test, 6 = after KC test, 8= after CK test and 10 = after Pd test)

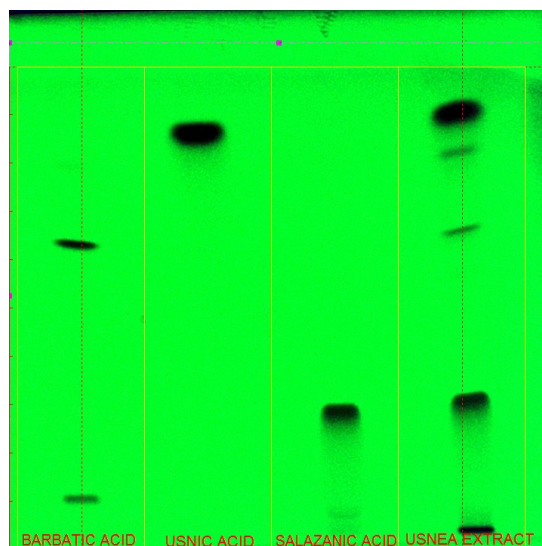

**Figure S3.** HPTLC Profiles for *U. longissima* extract along the standard compounds at 254 nm, TLC system: Toluene / Dioxan / Acetic acid - 72.50: 24.19 : 3.22

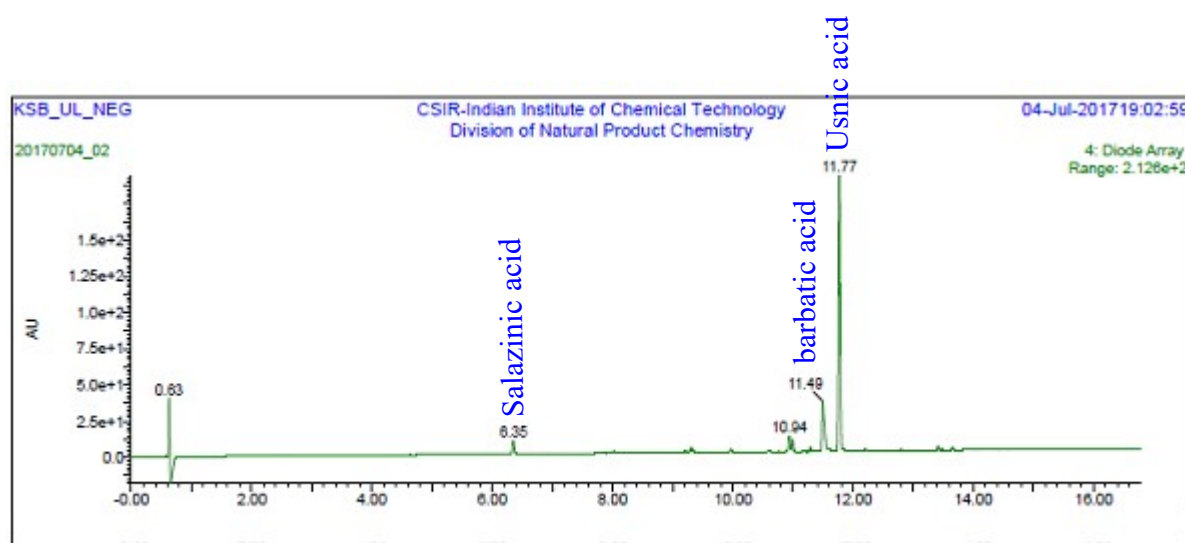

**Figure S4.** UPLC-PDA chromatogram of acetone extract of *U. longissima*

**Table S1.** LC-ESI-QToF-MS<sup>o</sup> (-ve mode) data of compounds from acetone extract of *Usnea longissima* and their product ions

| Compound Number | Compound                         | Ret time (min) | Monoisotopic mass [M-H] <sup>-</sup> | Molecular ion [M-H] <sup>-</sup> Formula (Error) (ppm)    | Fragment ions (Molecular formula) [M-H] <sup>-</sup>                                                                                                                                                                                                                                                                                                                                                                                                                                                                                                                                                                                                                                                                                                                                                                               |
|-----------------|----------------------------------|----------------|--------------------------------------|-----------------------------------------------------------|------------------------------------------------------------------------------------------------------------------------------------------------------------------------------------------------------------------------------------------------------------------------------------------------------------------------------------------------------------------------------------------------------------------------------------------------------------------------------------------------------------------------------------------------------------------------------------------------------------------------------------------------------------------------------------------------------------------------------------------------------------------------------------------------------------------------------------|
|                 |                                  |                | <i>m/z</i>                           |                                                           |                                                                                                                                                                                                                                                                                                                                                                                                                                                                                                                                                                                                                                                                                                                                                                                                                                    |
| 1               | <sup>#</sup> Salazinic acid      | 6.39           | 387.0346                             | C <sub>18</sub> H <sub>11</sub> O <sub>10</sub><br>(-1.6) | 343.0453(C <sub>17</sub> H <sub>11</sub> O <sub>8</sub> ), 325.0346(C <sub>17</sub> H <sub>9</sub> O <sub>7</sub> ), 313.0346(C <sub>16</sub> H <sub>9</sub> O <sub>7</sub> ), 299.0552(C <sub>16</sub> H <sub>11</sub> O <sub>6</sub> ), 269.0540(C <sub>15</sub> H <sub>9</sub> O <sub>5</sub> ), 253.0497(C <sub>15</sub> H <sub>9</sub> O <sub>4</sub> ), 243.0294(C <sub>13</sub> H <sub>7</sub> O <sub>5</sub> ), 227.0344(C <sub>13</sub> H <sub>7</sub> O <sub>4</sub> ), 177.0183(C <sub>9</sub> H <sub>5</sub> O <sub>4</sub> ), 165.0184(C <sub>8</sub> H <sub>5</sub> O <sub>4</sub> ), 151.0390(C <sub>8</sub> H <sub>7</sub> O <sub>3</sub> ), 121.0285(C <sub>7</sub> H <sub>5</sub> O <sub>2</sub> )                                                                                                               |
| 2               | Trihydroxy-octadecenoic acid     | 7.20           | 329.2324                             | C <sub>18</sub> H <sub>33</sub> O <sub>5</sub><br>(-1.2)  | 311.2222 (C <sub>18</sub> H <sub>31</sub> O <sub>4</sub> ), 293.2113 (C <sub>18</sub> H <sub>29</sub> O <sub>3</sub> ), 229.1439 (C <sub>12</sub> H <sub>21</sub> O <sub>4</sub> ), 211.1331 (C <sub>12</sub> H <sub>19</sub> O <sub>3</sub> ), 193.1230 (C <sub>12</sub> H <sub>17</sub> O <sub>2</sub> ), 83.1380 (C <sub>11</sub> H <sub>19</sub> O <sub>2</sub> ), 171.1018 (C <sub>9</sub> H <sub>15</sub> O <sub>3</sub> ), 139.1118 (C <sub>9</sub> H <sub>15</sub> O), 127.1118 (C <sub>8</sub> H <sub>15</sub> O), 99.0808 (C <sub>6</sub> H <sub>11</sub> O)                                                                                                                                                                                                                                                             |
| 3               | Tetrahydroxy-eicosanoic acid     | 7.41           | 375.2742                             | C <sub>20</sub> H <sub>39</sub> O <sub>6</sub>            | 357.2639 (C <sub>20</sub> H <sub>37</sub> O <sub>5</sub> ), 339.2536 (C <sub>20</sub> H <sub>35</sub> O <sub>4</sub> ), 321.2431(C <sub>20</sub> H <sub>33</sub> O <sub>3</sub> ), 289.1816 (C <sub>18</sub> H <sub>25</sub> O <sub>3</sub> ) 275.1499 (C <sub>13</sub> H <sub>23</sub> O <sub>6</sub> ), 245.1393 (C <sub>12</sub> H <sub>21</sub> O <sub>5</sub> ), 217.1447 (C <sub>11</sub> H <sub>21</sub> O <sub>4</sub> ), 199.1334 (C <sub>11</sub> H <sub>19</sub> O <sub>3</sub> ) 187.0968 (C <sub>9</sub> H <sub>15</sub> O <sub>4</sub> ), 181.1216 (C <sub>11</sub> H <sub>17</sub> O <sub>2</sub> ), 157.0865 (C <sub>8</sub> H <sub>13</sub> O <sub>3</sub> ), 141.0916 (C <sub>8</sub> H <sub>13</sub> O <sub>2</sub> ), 127.1121 (C <sub>8</sub> H <sub>15</sub> O), 113.0996 (C <sub>7</sub> H <sub>13</sub> O) |
| 4               | <sup>o</sup> Unreported compound | 7.82           | 385.1481                             | C <sub>18</sub> H <sub>25</sub> O <sub>9</sub><br>(-4.7)  | 299.1111 (C <sub>14</sub> H <sub>19</sub> O <sub>7</sub> ), 281.1005 (C <sub>14</sub> H <sub>17</sub> O <sub>6</sub> ) 213.0737 (C <sub>10</sub> H <sub>13</sub> O <sub>5</sub> ), 195.0632 (C <sub>10</sub> H <sub>11</sub> O <sub>4</sub> )                                                                                                                                                                                                                                                                                                                                                                                                                                                                                                                                                                                      |
| 5               | Tetrahydroxy-heneicosanoic acid  | 7.85           | 389.2890                             | C <sub>21</sub> H <sub>41</sub> O <sub>6</sub><br>(-3.3)  | 371.2785 (C <sub>21</sub> H <sub>39</sub> O <sub>5</sub> ), 353.2667 (C <sub>21</sub> H <sub>37</sub> O <sub>4</sub> ), 335.2575 (C <sub>21</sub> H <sub>35</sub> O <sub>3</sub> ), 259.1543 (C <sub>13</sub> H <sub>23</sub> O <sub>5</sub> ), 231.1598 (C <sub>12</sub> H <sub>23</sub> O <sub>4</sub> ), 213.1483 (C <sub>12</sub> H <sub>21</sub> O <sub>3</sub> ), 201.1119 (C <sub>10</sub> H <sub>17</sub> O <sub>4</sub> ), 195.1379 (C <sub>12</sub> H <sub>19</sub> O <sub>2</sub> ), 171.1019 (C <sub>9</sub> H <sub>15</sub> O <sub>3</sub> ), 157.1221 (C <sub>9</sub> H <sub>17</sub> O <sub>2</sub> ), 127.1101 (C <sub>8</sub> H <sub>15</sub> O)                                                                                                                                                                  |

|    |                                  |      |          |                                                          |                                                                                                                                                                                                                                                                                                                                                                                                                                                                                                                                                                                                                                                                                                                                                                                               |
|----|----------------------------------|------|----------|----------------------------------------------------------|-----------------------------------------------------------------------------------------------------------------------------------------------------------------------------------------------------------------------------------------------------------------------------------------------------------------------------------------------------------------------------------------------------------------------------------------------------------------------------------------------------------------------------------------------------------------------------------------------------------------------------------------------------------------------------------------------------------------------------------------------------------------------------------------------|
| 6  | # Methyl $\beta$ -orsellinate    | 8.09 | 195.0655 | C <sub>10</sub> H <sub>11</sub> O <sub>4</sub><br>(-1.0) | 180.0419 (C <sub>9</sub> H <sub>8</sub> O <sub>4</sub> ), 151.0754 (C <sub>9</sub> H <sub>11</sub> O <sub>2</sub> ),<br>136.0521 (C <sub>8</sub> H <sub>8</sub> O <sub>2</sub> )                                                                                                                                                                                                                                                                                                                                                                                                                                                                                                                                                                                                              |
| 7  | ° Unreported compound            | 8.30 | 475.3263 | C <sub>25</sub> H <sub>47</sub> O <sub>8</sub><br>(-1.7) | 461.3107 (C <sub>24</sub> H <sub>45</sub> O <sub>8</sub> ), 415.3051 (C <sub>23</sub> H <sub>43</sub> O <sub>6</sub> ),<br>403.3055 (C <sub>22</sub> H <sub>43</sub> O <sub>6</sub> ), 385.2968 (C <sub>22</sub> H <sub>41</sub> O <sub>5</sub> ),<br>243.1589 (C <sub>13</sub> H <sub>23</sub> O <sub>4</sub> ), 225.1488 (C <sub>13</sub> H <sub>21</sub> O <sub>3</sub> ),<br>215.1284 (C <sub>11</sub> H <sub>19</sub> O <sub>4</sub> ), 185.1591 (C <sub>12</sub> H <sub>21</sub> O),<br>157.1240 (C <sub>9</sub> H <sub>17</sub> O <sub>2</sub> )                                                                                                                                                                                                                                       |
| 8  | ° Unreported compound            | 8.56 | 489.3411 | C <sub>26</sub> H <sub>49</sub> O <sub>8</sub><br>(-3.3) | 447.3313 (C <sub>24</sub> H <sub>47</sub> O <sub>7</sub> ), 429.3206 (C <sub>24</sub> H <sub>45</sub> O <sub>6</sub> ),<br>411.3105 (C <sub>24</sub> H <sub>43</sub> O <sub>5</sub> ), 393.2995 (C <sub>24</sub> H <sub>41</sub> O <sub>4</sub> ),<br>383.3136 (C <sub>23</sub> H <sub>43</sub> O <sub>4</sub> ), 347.2935 (C <sub>23</sub> H <sub>39</sub> O <sub>2</sub> ),<br>331.3004 (C <sub>23</sub> H <sub>39</sub> O), 271.1919 (C <sub>15</sub> H <sub>27</sub> O <sub>4</sub> ),<br>253.1792 (C <sub>15</sub> H <sub>25</sub> O <sub>3</sub> ), 241.1431 (C <sub>13</sub> H <sub>21</sub> O <sub>4</sub> ),<br>197.1534 (C <sub>12</sub> H <sub>21</sub> O <sub>2</sub> ), 167.1422 (C <sub>11</sub> H <sub>19</sub> O),<br>59.0131 (C <sub>2</sub> H <sub>3</sub> O <sub>2</sub> ) |
| 9  | Unidentified                     | 8.69 | 375.1074 | C <sub>19</sub> H <sub>19</sub> O <sub>8</sub><br>(-1.6) | 359.0766 (C <sub>18</sub> H <sub>15</sub> O <sub>8</sub> ), 341.0657 (C <sub>18</sub> H <sub>13</sub> O <sub>7</sub> ),<br>326.0426 (C <sub>17</sub> H <sub>10</sub> O <sub>7</sub> ), 311.0192 (C <sub>16</sub> H <sub>7</sub> O <sub>7</sub> ),<br>257.0445 (C <sub>14</sub> H <sub>9</sub> O <sub>5</sub> ), 181.0501 (C <sub>9</sub> H <sub>9</sub> O <sub>4</sub> ),<br>163.0394 (C <sub>9</sub> H <sub>7</sub> O <sub>3</sub> )                                                                                                                                                                                                                                                                                                                                                         |
| 10 | Tetrahydroxy<br>tricosanoic acid | 8.80 | 417.3212 | C <sub>23</sub> H <sub>45</sub> O <sub>6</sub><br>(-0.7) | 403.3049 (C <sub>22</sub> H <sub>43</sub> O <sub>6</sub> ), 399.3104 (C <sub>23</sub> H <sub>43</sub> O <sub>5</sub> ),<br>381.3003 (C <sub>23</sub> H <sub>41</sub> O <sub>4</sub> ), 259.1906 (C <sub>14</sub> H <sub>27</sub> O <sub>4</sub> ),<br>241.1804 (C <sub>14</sub> H <sub>25</sub> O <sub>3</sub> ), 229.1440 (C <sub>12</sub> H <sub>21</sub> O <sub>4</sub> ),<br>201.1177 (C <sub>12</sub> H <sub>17</sub> O <sub>3</sub> ), 199.1336 (C <sub>11</sub> H <sub>19</sub> O <sub>3</sub> ),<br>185.1176 (C <sub>10</sub> H <sub>17</sub> O <sub>3</sub> ), 183.1395 (C <sub>11</sub> H <sub>19</sub> O <sub>2</sub> ),<br>155.1433 (C <sub>10</sub> H <sub>19</sub> O), 127.1128 (C <sub>18</sub> H <sub>15</sub> O),<br>99.0817 (C <sub>6</sub> H <sub>11</sub> O)              |
| 11 | ° Unreported compound            | 9.19 | 503.3630 | C <sub>27</sub> H <sub>51</sub> O <sub>8</sub><br>(9.1)  | 461.3467 (C <sub>25</sub> H <sub>49</sub> O <sub>7</sub> ), 443.3365 (C <sub>25</sub> H <sub>47</sub> O <sub>6</sub> ),<br>425.3244 (C <sub>25</sub> H <sub>45</sub> O <sub>5</sub> ), 241.1442 (C <sub>13</sub> H <sub>21</sub> O <sub>4</sub> ),<br>171.1381 (C <sub>10</sub> H <sub>19</sub> O <sub>2</sub> )                                                                                                                                                                                                                                                                                                                                                                                                                                                                              |
| 12 | 4-O-Demethylbarbatic<br>acid     | 9.35 | 345.0974 | C <sub>18</sub> H <sub>17</sub> O <sub>7</sub><br>(0.0)  | 181.0501 (C <sub>9</sub> H <sub>9</sub> O <sub>4</sub> ), 163.0392 (C <sub>9</sub> H <sub>7</sub> O <sub>3</sub> ),<br>137.0600 (C <sub>8</sub> H <sub>9</sub> O <sub>2</sub> )                                                                                                                                                                                                                                                                                                                                                                                                                                                                                                                                                                                                               |
| 13 | ° Unreported compound            | 9.81 | 517.3734 | C <sub>28</sub> H <sub>53</sub> O <sub>8</sub><br>(-1.2) | 475.3626 (C <sub>26</sub> H <sub>51</sub> O <sub>7</sub> ), 457.3530 (C <sub>26</sub> H <sub>49</sub> O <sub>6</sub> ),<br>439.3418 (C <sub>26</sub> H <sub>47</sub> O <sub>5</sub> ), 421.3325 (C <sub>26</sub> H <sub>45</sub> O <sub>4</sub> ),<br>411.3470 (C <sub>25</sub> H <sub>47</sub> O <sub>4</sub> ), 403.3204 (C <sub>26</sub> H <sub>43</sub> O <sub>3</sub> ),                                                                                                                                                                                                                                                                                                                                                                                                                 |

|    |                                                          |       |          |                                                           |                                                                                                                                                                                                                                                                                                                                                                                                                                                                                                                                                            |
|----|----------------------------------------------------------|-------|----------|-----------------------------------------------------------|------------------------------------------------------------------------------------------------------------------------------------------------------------------------------------------------------------------------------------------------------------------------------------------------------------------------------------------------------------------------------------------------------------------------------------------------------------------------------------------------------------------------------------------------------------|
|    |                                                          |       |          |                                                           | 359.3311 (C <sub>25</sub> H <sub>43</sub> O), 329.1956 (C <sub>17</sub> H <sub>29</sub> O <sub>6</sub> ), 271.1916 (C <sub>15</sub> H <sub>27</sub> O <sub>4</sub> ), 241.1439 (C <sub>13</sub> H <sub>21</sub> O <sub>4</sub> ), 197.1541 (C <sub>12</sub> H <sub>21</sub> O <sub>2</sub> ), 185.1537 (C <sub>11</sub> H <sub>21</sub> O <sub>2</sub> ), 167.1434 (C <sub>11</sub> H <sub>19</sub> O), 155.1426 (C <sub>10</sub> H <sub>19</sub> O), 59.0134 (C <sub>2</sub> H <sub>3</sub> O <sub>2</sub> )                                              |
| 14 | Usenamine A                                              | 10.01 | 342.0977 | C <sub>18</sub> H <sub>16</sub> NO <sub>6</sub><br>(-0.3) | 327.0744 (C <sub>17</sub> H <sub>13</sub> NO <sub>6</sub> ), 312.0513 (C <sub>16</sub> H <sub>10</sub> NO <sub>6</sub> ), 301.0712 (C <sub>16</sub> H <sub>13</sub> O <sub>6</sub> ), 286.0477 (C <sub>15</sub> H <sub>10</sub> O <sub>6</sub> ), 259.0605 (C <sub>14</sub> H <sub>11</sub> O <sub>5</sub> ), 231.0657 (C <sub>13</sub> H <sub>11</sub> O <sub>4</sub> )<br>139.0388 (C <sub>7</sub> H <sub>7</sub> O <sub>3</sub> ), 82.0296 (C <sub>4</sub> H <sub>4</sub> NO)                                                                           |
| 15 | ° Unreported compound                                    | 10.19 | 383.2430 | C <sub>21</sub> H <sub>35</sub> O <sub>6</sub><br>(-1.0)  | 339.2534 (C <sub>20</sub> H <sub>35</sub> O <sub>4</sub> ), 315.2525 (C <sub>18</sub> H <sub>35</sub> O <sub>4</sub> ), 295.2635 (C <sub>19</sub> H <sub>35</sub> O <sub>2</sub> ), 279.2318 (C <sub>18</sub> H <sub>31</sub> O <sub>2</sub> )<br>253.2164 (C <sub>16</sub> H <sub>29</sub> O <sub>2</sub> ), 181.1589 (C <sub>12</sub> H <sub>21</sub> O)                                                                                                                                                                                                 |
| 16 | Unidentified                                             | 10.42 | 315.2530 | C <sub>18</sub> H <sub>35</sub> O <sub>4</sub><br>(-1.6)  | 297.2424 (C <sub>18</sub> H <sub>33</sub> O <sub>3</sub> ), 279.2321 (C <sub>18</sub> H <sub>31</sub> O <sub>2</sub> ), 267.2313 (C <sub>17</sub> H <sub>31</sub> O <sub>2</sub> ), 251.2365 (C <sub>17</sub> H <sub>31</sub> O), 239.2371 (C <sub>16</sub> H <sub>31</sub> O), 201.1122 (C <sub>10</sub> H <sub>17</sub> O <sub>4</sub> ), 171.1019 (C <sub>9</sub> H <sub>15</sub> O <sub>3</sub> ), 155.1069 (C <sub>9</sub> H <sub>15</sub> O <sub>2</sub> ), 141.1274 (C <sub>9</sub> H <sub>17</sub> O), 127.1119 (C <sub>8</sub> H <sub>15</sub> O) |
| 17 | Isomuronic acid                                          | 11.3  | 365.2338 | C <sub>21</sub> H <sub>33</sub> O <sub>5</sub><br>(2.7)   | 321.2445 (C <sub>20</sub> H <sub>33</sub> O <sub>3</sub> ), 277.2549 (C <sub>19</sub> H <sub>33</sub> O), 261.2224 (C <sub>18</sub> H <sub>29</sub> O), 233.2266 (C <sub>17</sub> H <sub>29</sub> ), 223.2064 (C <sub>15</sub> H <sub>27</sub> O), 207.2114 (C <sub>15</sub> H <sub>27</sub> ), 183.1749 (C <sub>12</sub> H <sub>23</sub> O), 169.1591 (C <sub>11</sub> H <sub>21</sub> O), 155.1434 (C <sub>10</sub> H <sub>19</sub> O), 123.0811 (C <sub>8</sub> H <sub>11</sub> O)                                                                      |
| 18 | ° Unreported compound                                    | 10.80 | 425.2900 | C <sub>24</sub> H <sub>41</sub> O <sub>6</sub><br>(-0.7)  | 413.2901 (C <sub>23</sub> H <sub>41</sub> O <sub>6</sub> ), 399.2747 (C <sub>22</sub> H <sub>39</sub> O <sub>6</sub> ), 355.2870 (C <sub>21</sub> H <sub>39</sub> O <sub>4</sub> ), 337.3107 (C <sub>22</sub> H <sub>41</sub> O <sub>2</sub> ), 311.2960 (C <sub>20</sub> H <sub>39</sub> O <sub>2</sub> ), 269.2131 (C <sub>16</sub> H <sub>29</sub> O <sub>3</sub> ), 201.1268 (C <sub>14</sub> H <sub>17</sub> O), 195.1396 (C <sub>12</sub> H <sub>19</sub> O <sub>2</sub> )<br>157.0856 (C <sub>8</sub> H <sub>13</sub> O <sub>3</sub> )              |
| 19 | * 18 <i>R</i> hydroxy dihydroalloprotolichesterinic acid | 10.67 | 369.2641 | C <sub>21</sub> H <sub>37</sub> O <sub>5</sub><br>(0.0)   | 325.2746 (C <sub>20</sub> H <sub>37</sub> O <sub>3</sub> ), 279.2692 (C <sub>19</sub> H <sub>35</sub> O), 265.2534 (C <sub>18</sub> H <sub>33</sub> O), 113.0236 (C <sub>5</sub> H <sub>5</sub> O <sub>3</sub> )                                                                                                                                                                                                                                                                                                                                           |
| 20 | * Neuropogolic acid                                      | 11.05 | 367.2489 | C <sub>21</sub> H <sub>35</sub> O <sub>5</sub><br>(1.4)   | 323.2588 (C <sub>20</sub> H <sub>35</sub> O <sub>3</sub> ), 295.2636 (C <sub>19</sub> H <sub>35</sub> O <sub>2</sub> ), 279.2689 (C <sub>19</sub> H <sub>35</sub> O), 277.2533 (C <sub>19</sub> H <sub>33</sub> O), 263.2375 (C <sub>18</sub> H <sub>31</sub> O), 235.2421 (C <sub>17</sub> H <sub>31</sub> ),                                                                                                                                                                                                                                             |

|    |                              |       |          |                                                          |                                                                                                                                                                                                                                                                                                                                                                                                                                                                                                                                                                                                                                                                                          |
|----|------------------------------|-------|----------|----------------------------------------------------------|------------------------------------------------------------------------------------------------------------------------------------------------------------------------------------------------------------------------------------------------------------------------------------------------------------------------------------------------------------------------------------------------------------------------------------------------------------------------------------------------------------------------------------------------------------------------------------------------------------------------------------------------------------------------------------------|
|    |                              |       |          |                                                          | 207.2110 (C <sub>15</sub> H <sub>27</sub> ), 169.1588 (C <sub>11</sub> H <sub>21</sub> O),<br>155.1431 (C <sub>10</sub> H <sub>19</sub> O), 113.0239 (C <sub>5</sub> H <sub>5</sub> O <sub>3</sub> )                                                                                                                                                                                                                                                                                                                                                                                                                                                                                     |
| 21 | * Barbatic acid              | 11.63 | 359.1134 | C <sub>19</sub> H <sub>19</sub> O <sub>7</sub><br>(0.8)  | 181.0504 (C <sub>9</sub> H <sub>9</sub> O <sub>4</sub> ), 163.0394 (C <sub>9</sub> H <sub>7</sub> O <sub>3</sub> ),<br>137.0600 (C <sub>8</sub> H <sub>9</sub> O <sub>2</sub> ), 119.0492 (C <sub>8</sub> H <sub>7</sub> O)                                                                                                                                                                                                                                                                                                                                                                                                                                                              |
| 22 | * Usnic acid                 | 11.88 | 343.0822 | C <sub>18</sub> H <sub>15</sub> O <sub>7</sub><br>(1.2)  | 328.0592 (C <sub>17</sub> H <sub>12</sub> O <sub>7</sub> ), 313.0352 (C <sub>16</sub> H <sub>9</sub> O <sub>7</sub> ),<br>299.0920 (C <sub>17</sub> H <sub>15</sub> O <sub>5</sub> ), 259.0610 (C <sub>14</sub> H <sub>11</sub> O <sub>5</sub> ),<br>231.0658 (C <sub>13</sub> H <sub>11</sub> O <sub>4</sub> ), 139.0395 (C <sub>7</sub> H <sub>7</sub> O <sub>3</sub> )<br>83.0132 (C <sub>4</sub> H <sub>3</sub> O <sub>2</sub> )                                                                                                                                                                                                                                                     |
| 23 | Vinapraesorediosic<br>acid A | 12.40 | 393.2633 | C <sub>23</sub> H <sub>37</sub> O <sub>5</sub><br>(2.0)  | 349.2740 (C <sub>22</sub> H <sub>37</sub> O <sub>3</sub> ), 305.2838 (C <sub>21</sub> H <sub>37</sub> O),<br>279.2699 (C <sub>19</sub> H <sub>35</sub> O), 235.2420 (C <sub>17</sub> H <sub>31</sub> ),<br>211.2081 (C <sub>14</sub> H <sub>27</sub> O), 197.1905 (C <sub>12</sub> H <sub>25</sub> O)                                                                                                                                                                                                                                                                                                                                                                                    |
| 24 | ° Unreported compound        | 12.59 | 357.0974 | C <sub>19</sub> H <sub>17</sub> O <sub>7</sub><br>(0.0)  | 342.0737 (C <sub>18</sub> H <sub>14</sub> O <sub>7</sub> ), 314.0425 (C <sub>16</sub> H <sub>10</sub> O <sub>7</sub> ),<br>301.0710 (C <sub>16</sub> H <sub>13</sub> O <sub>6</sub> ), 286.0481 (C <sub>15</sub> H <sub>10</sub> O <sub>6</sub> ),<br>273.0759 (C <sub>15</sub> H <sub>13</sub> O <sub>5</sub> ), 259.0604 (C <sub>14</sub> H <sub>11</sub> O <sub>4</sub> )<br>245.0812 (C <sub>14</sub> H <sub>13</sub> O <sub>4</sub> ), 231.0653 (C <sub>13</sub> H <sub>11</sub> O <sub>4</sub> )<br>189.0546 (C <sub>11</sub> H <sub>9</sub> O <sub>3</sub> ), 97.0284 (C <sub>5</sub> H <sub>5</sub> O <sub>2</sub> ),<br>83.0136 (C <sub>4</sub> H <sub>3</sub> O <sub>2</sub> ) |
| 25 | ° Unreported compound        | 12.96 | 412.1766 | C <sub>23</sub> H <sub>26</sub> NO <sub>6</sub><br>(1.5) | 397.1523 (C <sub>22</sub> H <sub>23</sub> NO <sub>6</sub> ), 380.1498 (C <sub>22</sub> H <sub>22</sub> NO <sub>5</sub> ),<br>368.1137 (C <sub>20</sub> H <sub>18</sub> NO <sub>6</sub> ), 354.0977 (C <sub>19</sub> H <sub>16</sub> NO <sub>6</sub> ),<br>341.0906 (C <sub>18</sub> H <sub>15</sub> NO <sub>6</sub> ), 326.0667 (C <sub>17</sub> H <sub>12</sub> NO <sub>6</sub> ),<br>312.0510 (C <sub>16</sub> H <sub>10</sub> NO <sub>6</sub> ), 259.0606 (C <sub>14</sub> H <sub>11</sub> O <sub>5</sub> )<br>231.0657 (C <sub>13</sub> H <sub>11</sub> O <sub>4</sub> ), 152.1072 (C <sub>9</sub> H <sub>14</sub> NO)                                                               |
| 26 | Unidentified                 | 13.87 | 631.4926 | C <sub>39</sub> H <sub>67</sub> O <sub>6</sub><br>(-1.9) | 587.5027 (C <sub>38</sub> H <sub>67</sub> O <sub>4</sub> ), 543.5126 (C <sub>37</sub> H <sub>67</sub> O <sub>2</sub> ),<br>369.2632 (C <sub>21</sub> H <sub>37</sub> O <sub>5</sub> ), 351.2533 (C <sub>21</sub> H <sub>35</sub> O <sub>4</sub> ),<br>325.2738 (C <sub>20</sub> H <sub>37</sub> O <sub>3</sub> ), 307.2634 (C <sub>20</sub> H <sub>35</sub> O <sub>2</sub> ),<br>279.2320 (C <sub>18</sub> H <sub>31</sub> O <sub>2</sub> ), 261.2215 (C <sub>18</sub> H <sub>29</sub> O)<br>113.0234 (C <sub>5</sub> H <sub>5</sub> O <sub>3</sub> )                                                                                                                                    |

\* Compared with isolated compounds.

0 # Compared with standard compounds.

1 ° Tentatively identified.



**Table S2:** Structures of the compounds tentatively identified by UPLC-ESI-QToF-MS<sup>e</sup>

|    | <b>Compound name</b>            | <b>Structure</b>                                                                     |
|----|---------------------------------|--------------------------------------------------------------------------------------|
| 1  | Salazinic acid                  | 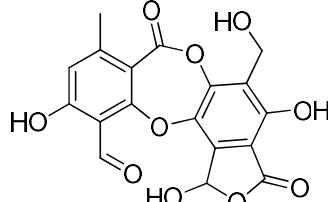   |
| 2  | Trihydroxy-octadecenoic acid    |    |
| 3  | Tetrahydroxy-eicosanoic acid    |    |
| 4  | Unreported compound             |    |
| 5  | Tetrahydroxy-heneicosanoic acid |   |
| 6  | Methyl β-orsellinate            |  |
| 7  | Unreported compound             |  |
| 8  | Unreported compound             |  |
| 10 | Tetrahydroxy tricosanoic acid   |  |
| 11 | Unreported compound             |  |

|    |                                                        |  |
|----|--------------------------------------------------------|--|
| 12 | 4-O-Demethylbarbatic acid                              |  |
| 13 | Unreported compound                                    |  |
| 14 | Usenamine A                                            |  |
| 15 | Unreported compound                                    |  |
| 17 | Isomuronic acid                                        |  |
| 18 | Unreported compound                                    |  |
| 19 | 18 <i>R</i> hydroxy dihydroalloprotolichesterinic acid |  |
| 20 | Neuropogolic acid                                      |  |
| 21 | Barbatic acid                                          |  |

|    |                           |                                                                                                                                                                                                                                                                                                                                                                                                                                                                                                                                                     |
|----|---------------------------|-----------------------------------------------------------------------------------------------------------------------------------------------------------------------------------------------------------------------------------------------------------------------------------------------------------------------------------------------------------------------------------------------------------------------------------------------------------------------------------------------------------------------------------------------------|
| 22 | Usnic acid                | 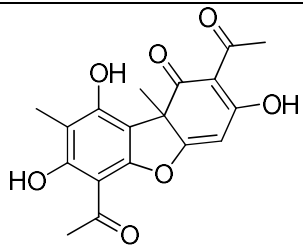 <p>The structure of Usnic acid is a dimeric phenol. It consists of two 3,4,5-trihydroxyphenyl rings linked at their 1-positions by a central oxygen atom. Each ring is substituted with a methyl group at the 2-position and an acetyl group at the 6-position. The central oxygen atom is also bonded to a methyl group.</p>                                                                                                                                    |
| 23 | Vinapraesorediosic acid A |  <p>The structure of Vinapraesorediosic acid A is a dimeric phenol with a repeating unit. It features two 3,4,5-trihydroxyphenyl rings linked at their 1-positions by a central oxygen atom. Each ring is substituted with a methyl group at the 2-position and a carboxylic acid group at the 6-position. The central oxygen atom is also bonded to a methyl group. The structure includes a repeating unit indicated by a subscript 'n' and a value 'n=15'.</p> |
| 24 | Unreported compound       |  <p>The structure of the unreported compound is a dimeric phenol. It consists of two 3,4,5-trihydroxyphenyl rings linked at their 1-positions by a central oxygen atom. Each ring is substituted with a methyl group at the 2-position and an acetyl group at the 6-position. The central oxygen atom is also bonded to a methyl group.</p>                                                                                                                       |
| 25 | Unreported compound       |  <p>The structure of the unreported compound is a dimeric phenol. It consists of two 3,4,5-trihydroxyphenyl rings linked at their 1-positions by a central oxygen atom. Each ring is substituted with a methyl group at the 2-position and an acetyl group at the 6-position. The central oxygen atom is also bonded to a methyl group. The structure includes an R group and a definition for R as a pentyl chain.</p>                                          |

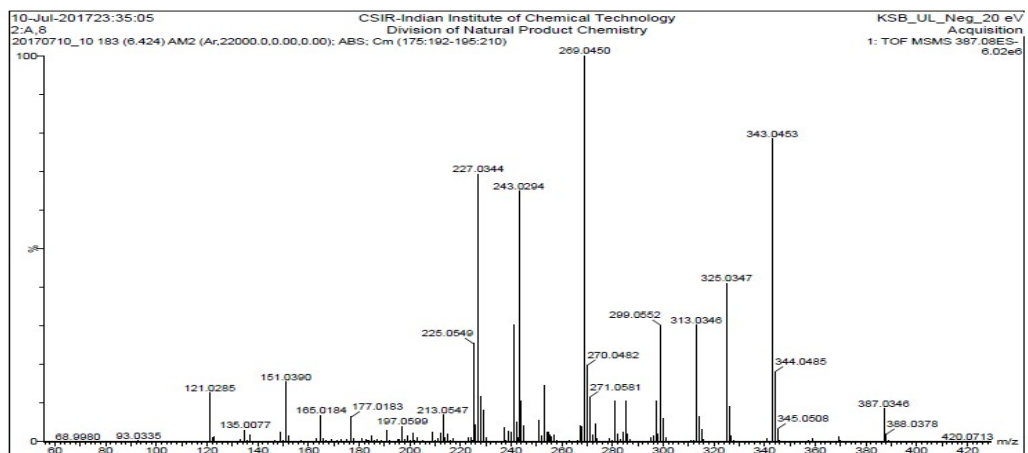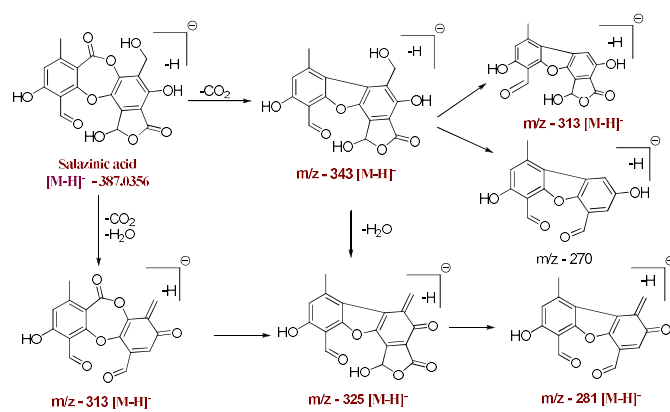

Figure S5. MS/MS spectrum and proposed fragmentation of compound 1

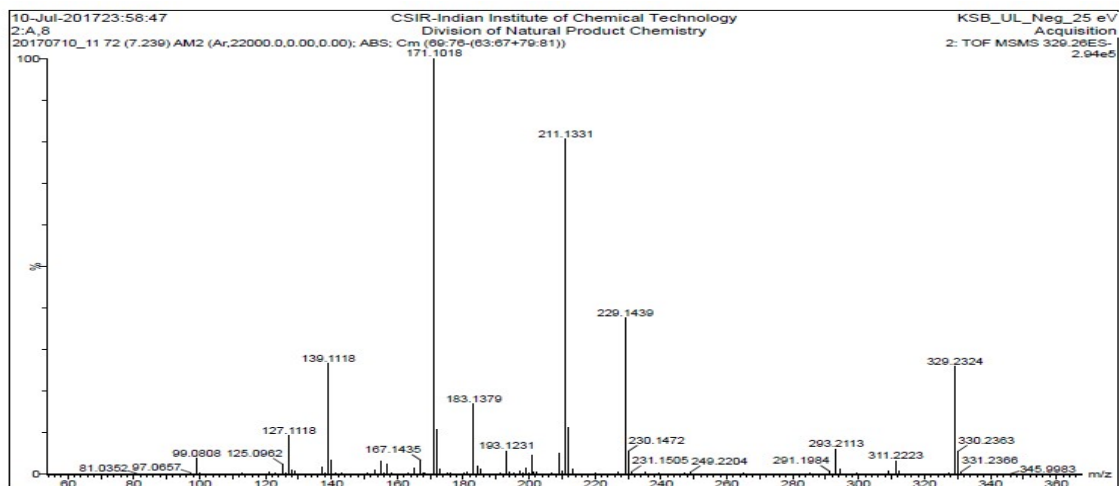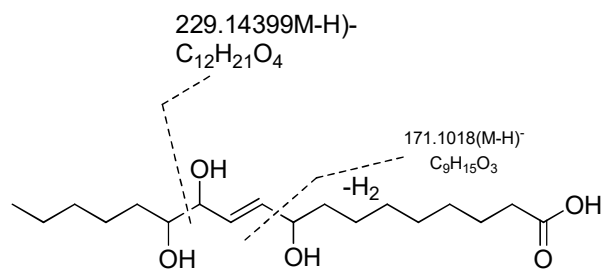

**Figure S6.** MS/MS spectrum and proposed fragmentation of compound 2

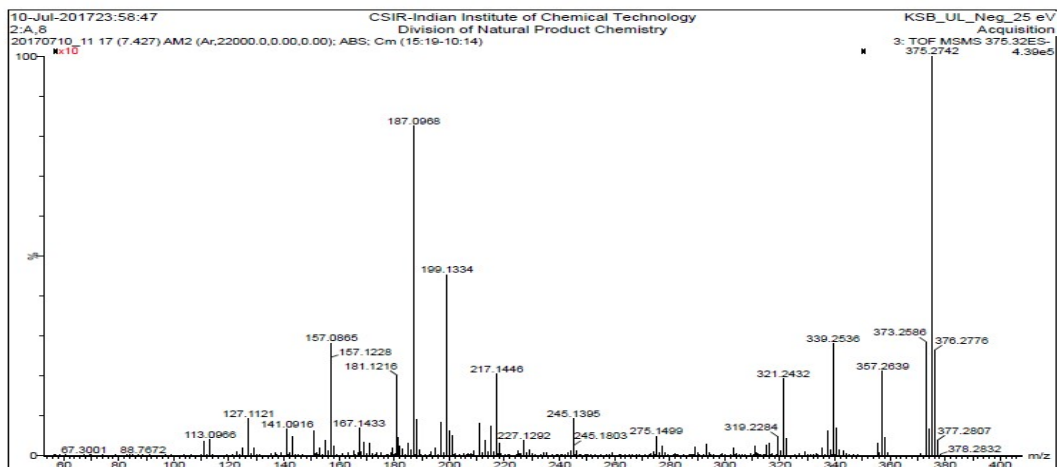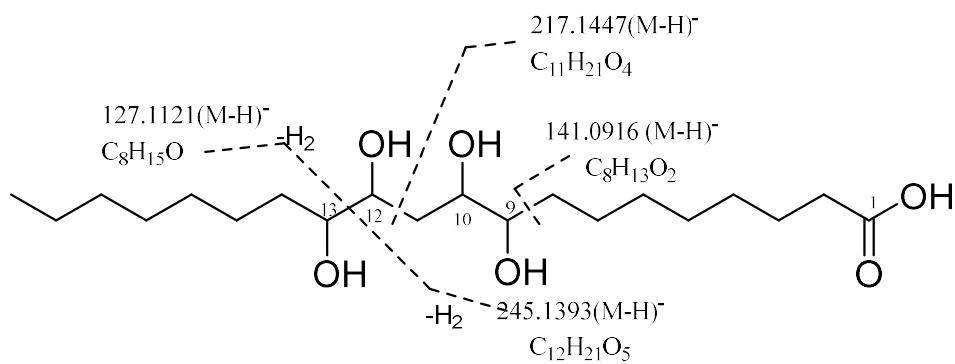

**Figure S7.** MS/MS spectrum and proposed fragmentation of compound **3**

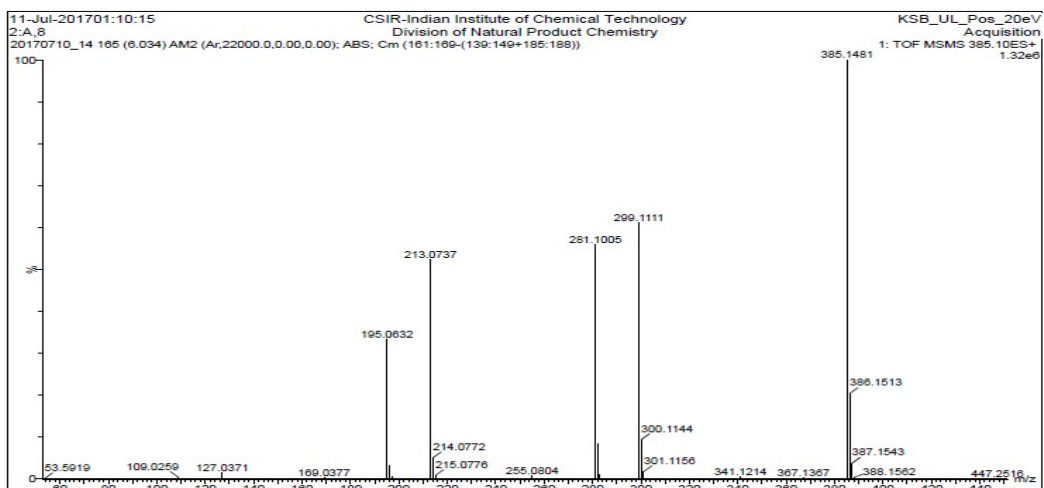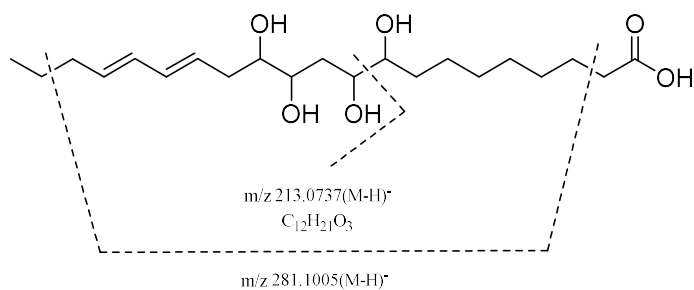

**Figure S8.** MS/MS spectrum and proposed fragmentation of compound **4**

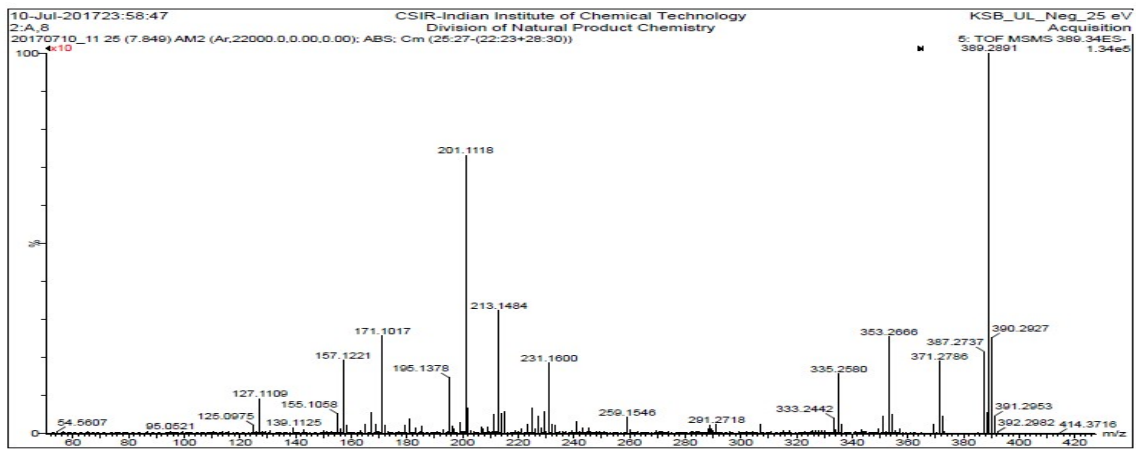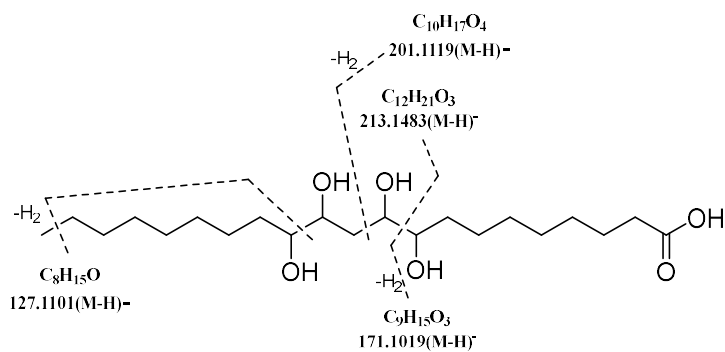

**Figure S9.** MS/MS spectrum and proposed fragmentation of compound **5**



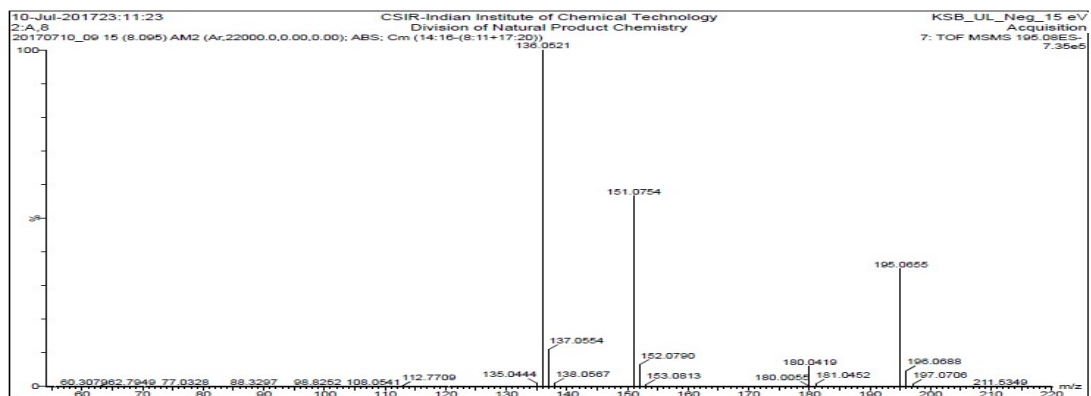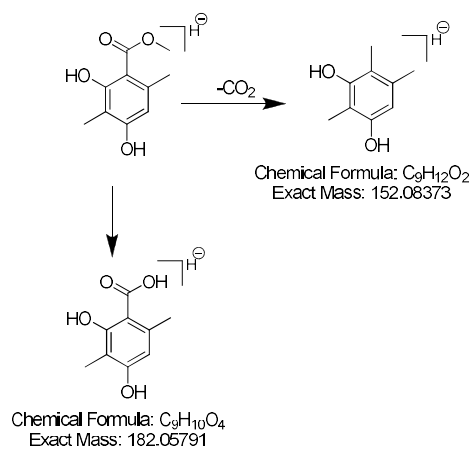

**Figure S10.** MS/MS spectrum and proposed fragmentation of compound **6**

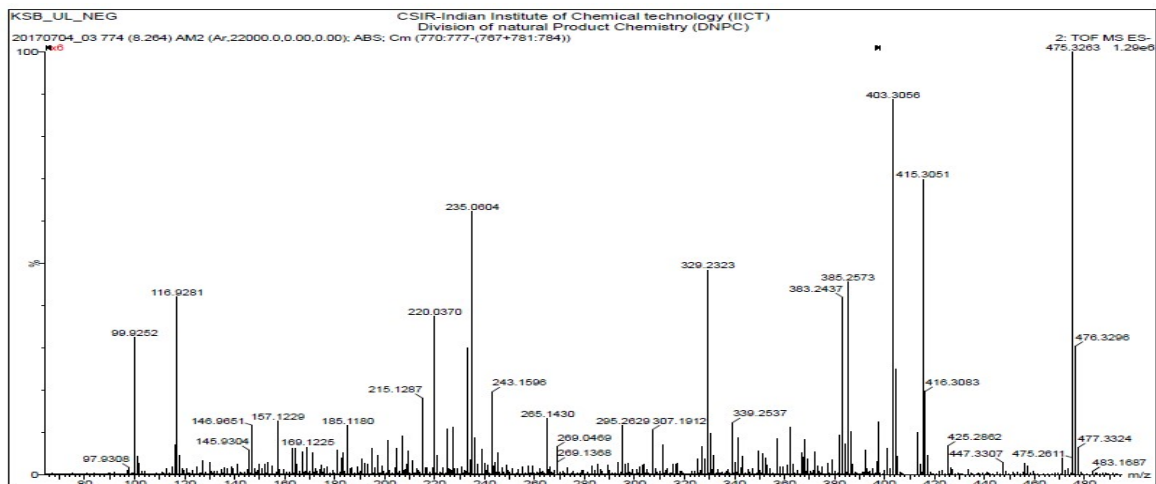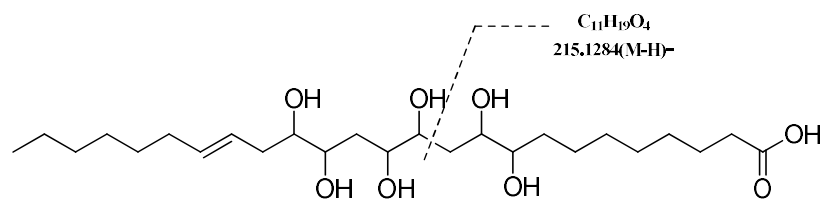

**Figure S11.** MS/MS spectrum and proposed fragmentation of compound 7

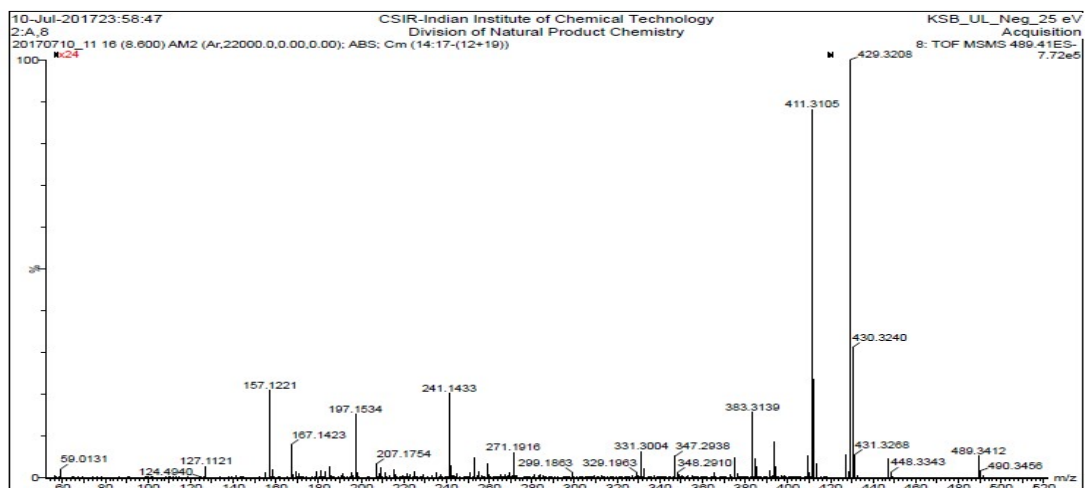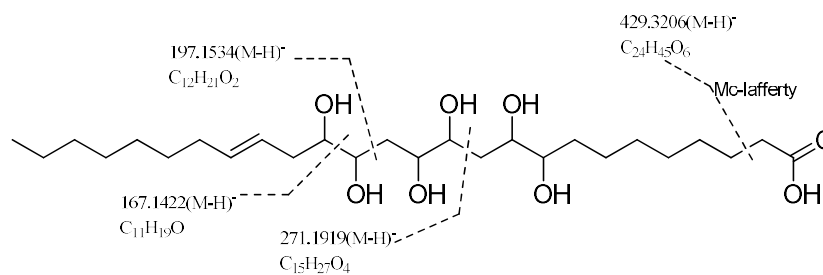

**Figure S12.** MS/MS spectrum and proposed fragmentation of compound **8**

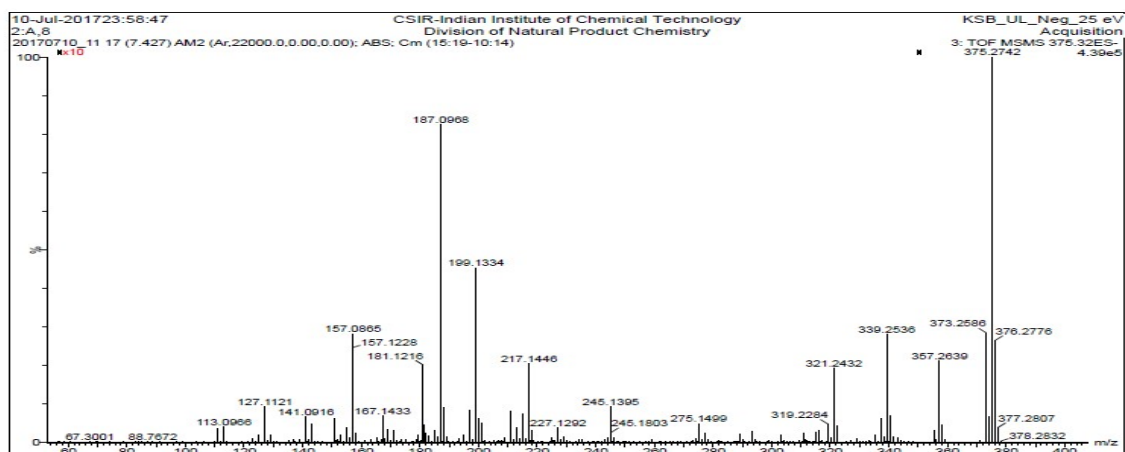

**Figure S13.** MS/MS spectrum of compound **9**

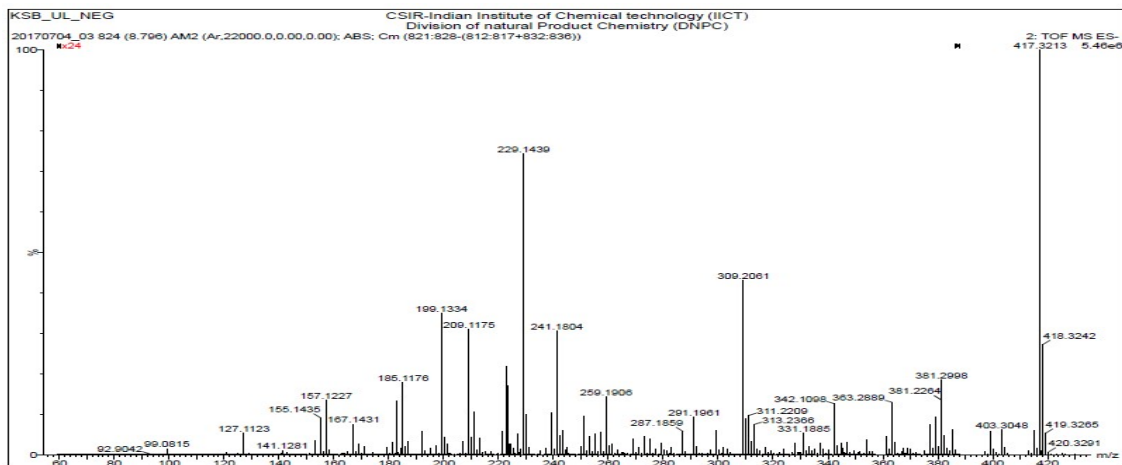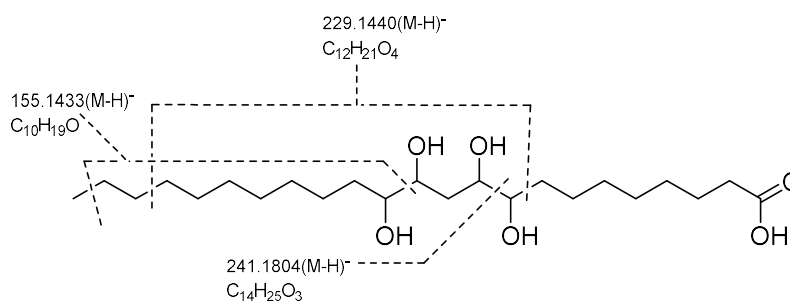

**Figure S14.** MS/MS spectrum and proposed fragmentation of compound **10**

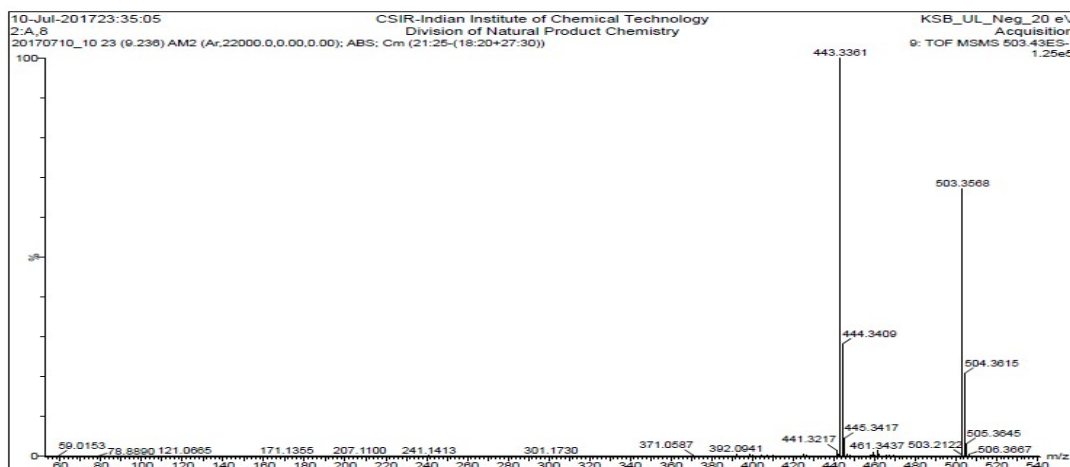

**Figure S15.** MS/MS spectrum of compound **11**

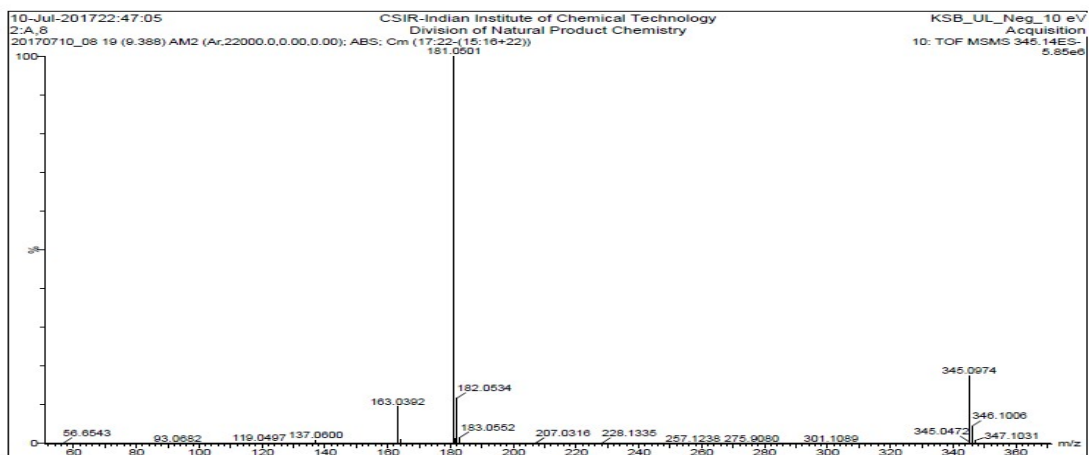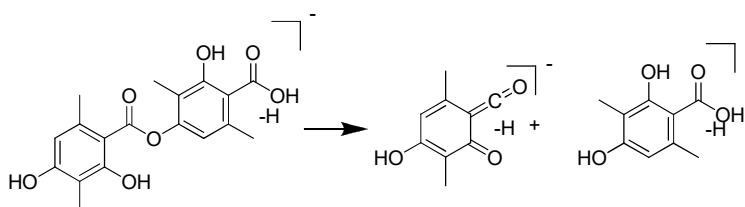

**Figure S16.** MS/MS spectrum and proposed fragmentation of compound **12**

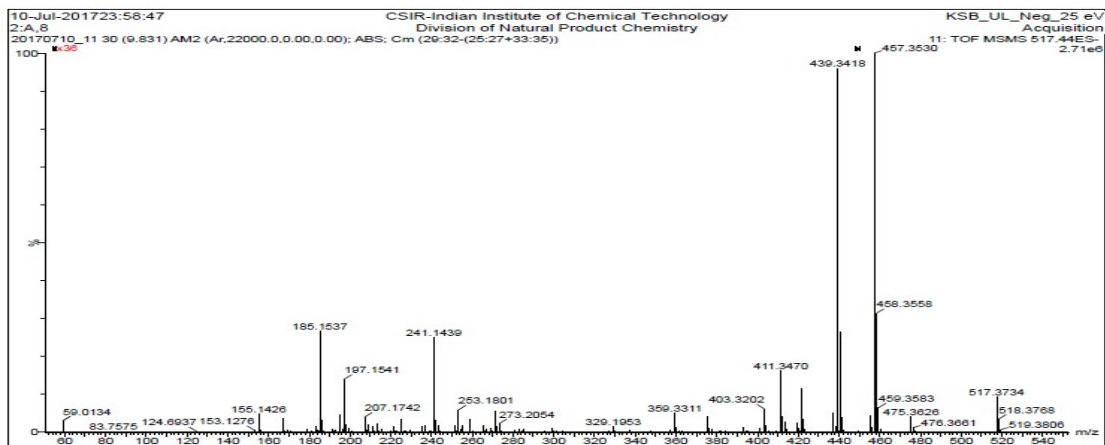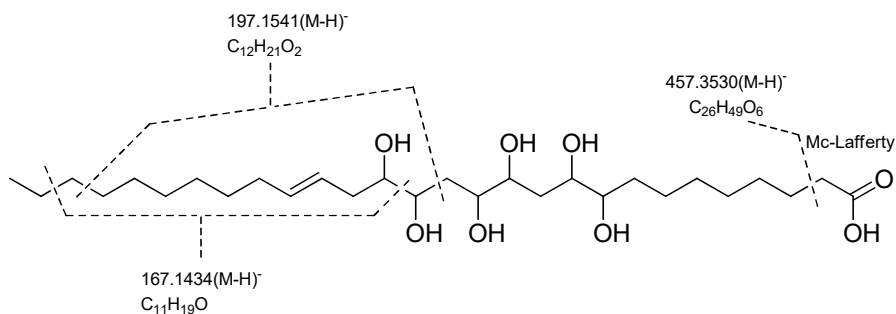

**Figure S17.** MS/MS spectrum and proposed fragmentation of compound **13**

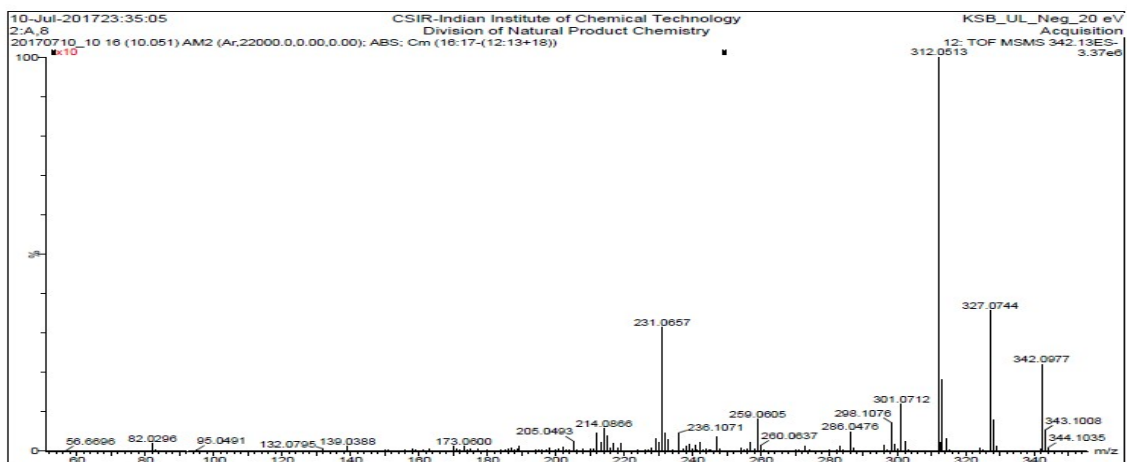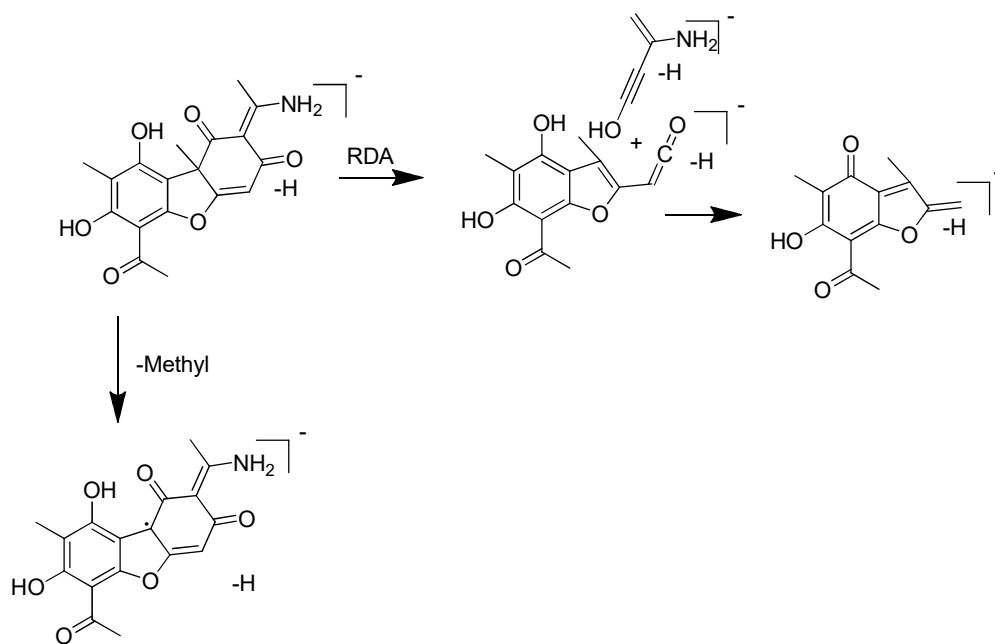

**Figure S18.** MS/MS spectrum and proposed fragmentation of compound 14

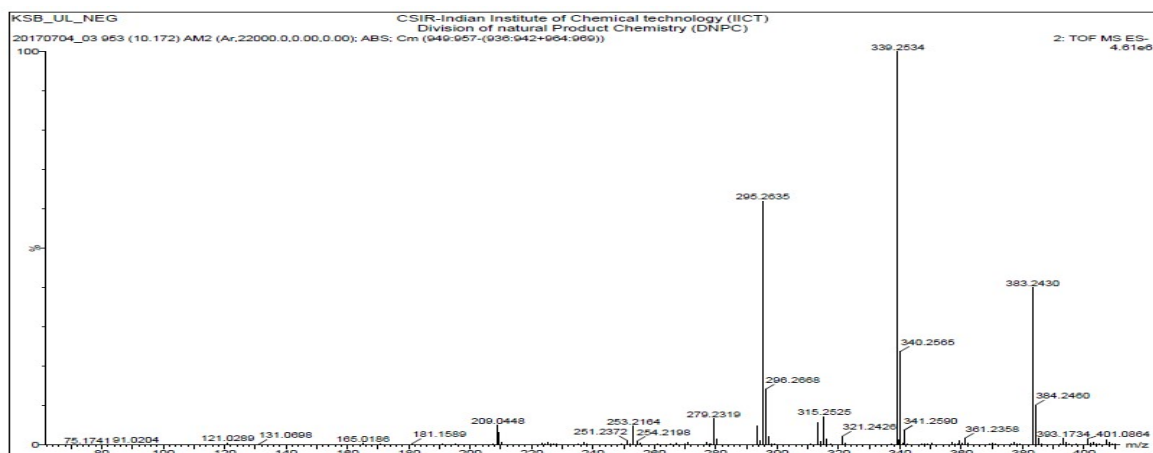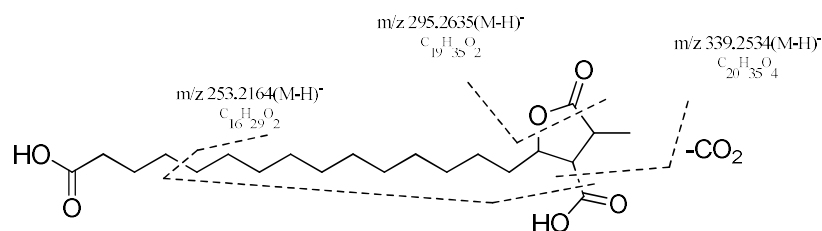

**Figure S19.** MS/MS spectrum and proposed fragmentation of compound **15**

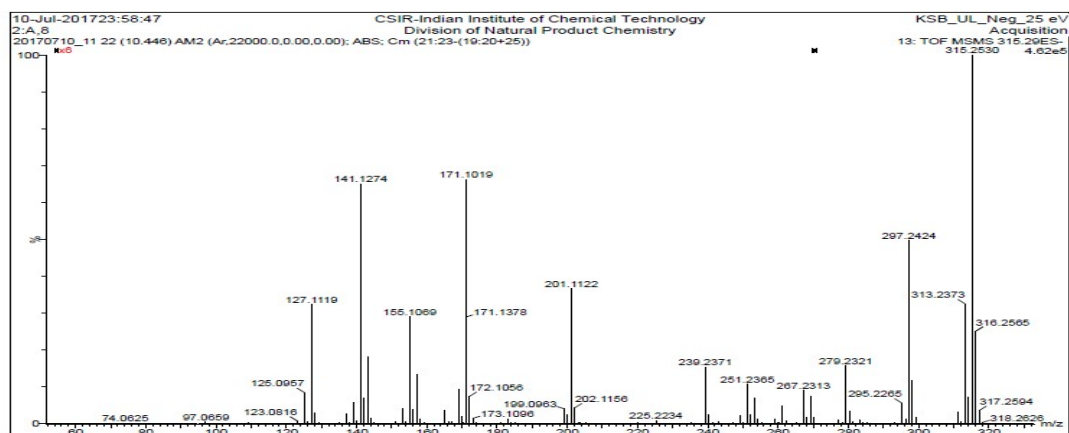

**Figure S20.** MS/MS spectrum of compound **16**

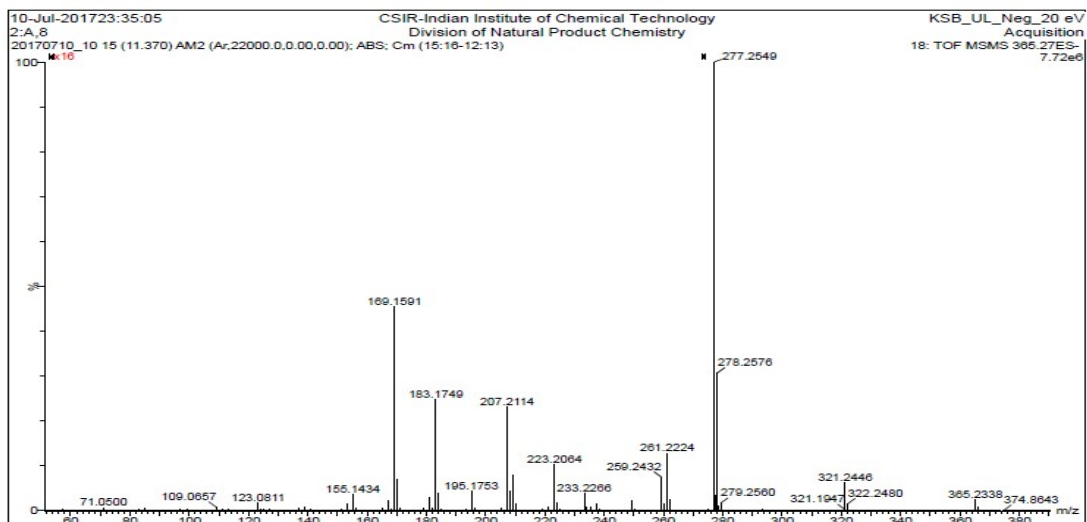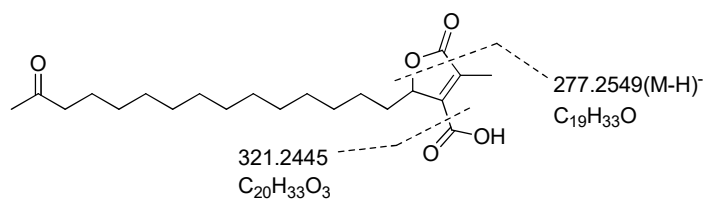

**Figure S21.** MS/MS spectrum and proposed fragmentation of compound 17



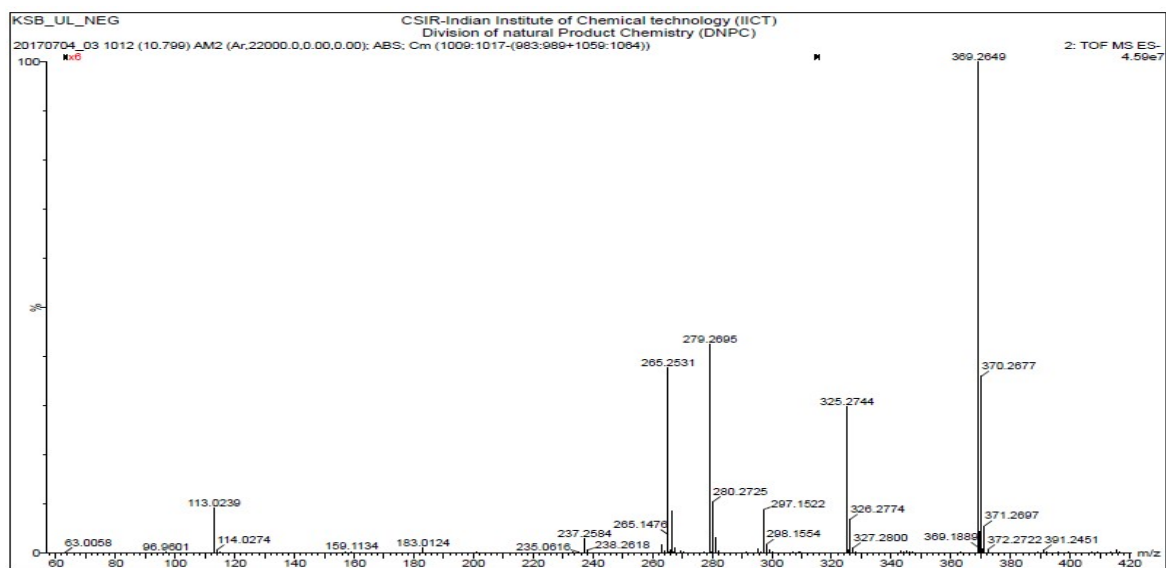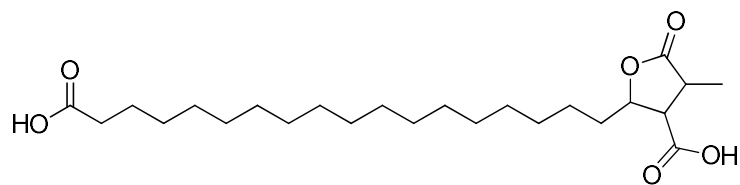

**Figure S22.** MS/MS spectrum and proposed fragmentation of compound **18**

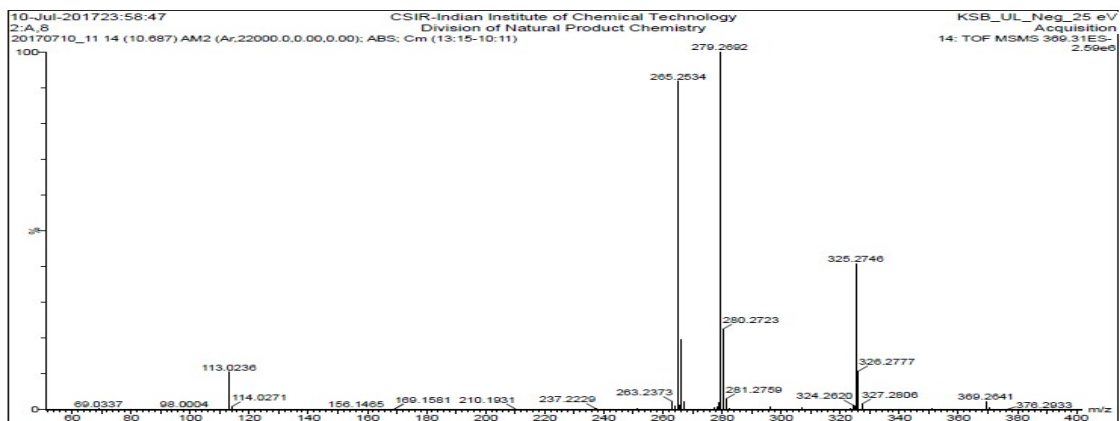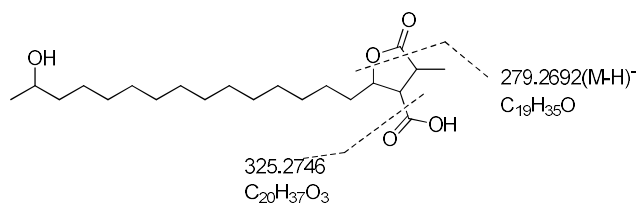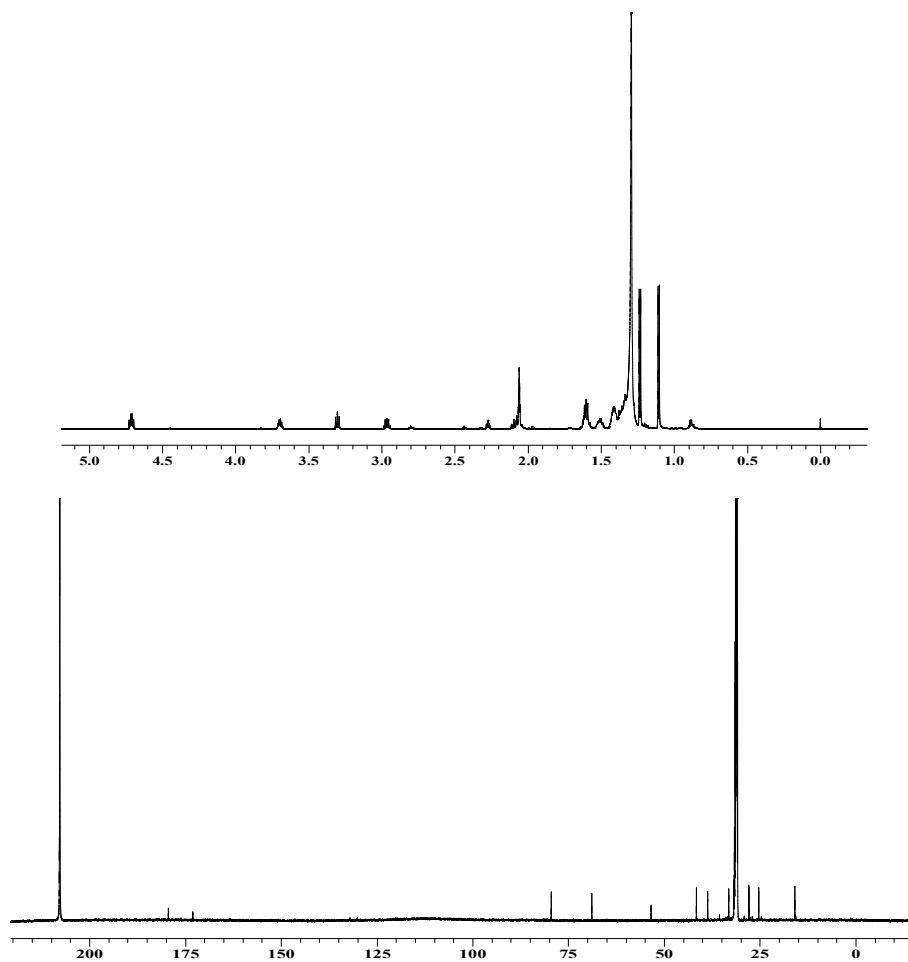

**Figure S23.** MS/MS spectrum, proposed fragmentation and <sup>1</sup>H & <sup>13</sup>C NMR of compound **19**

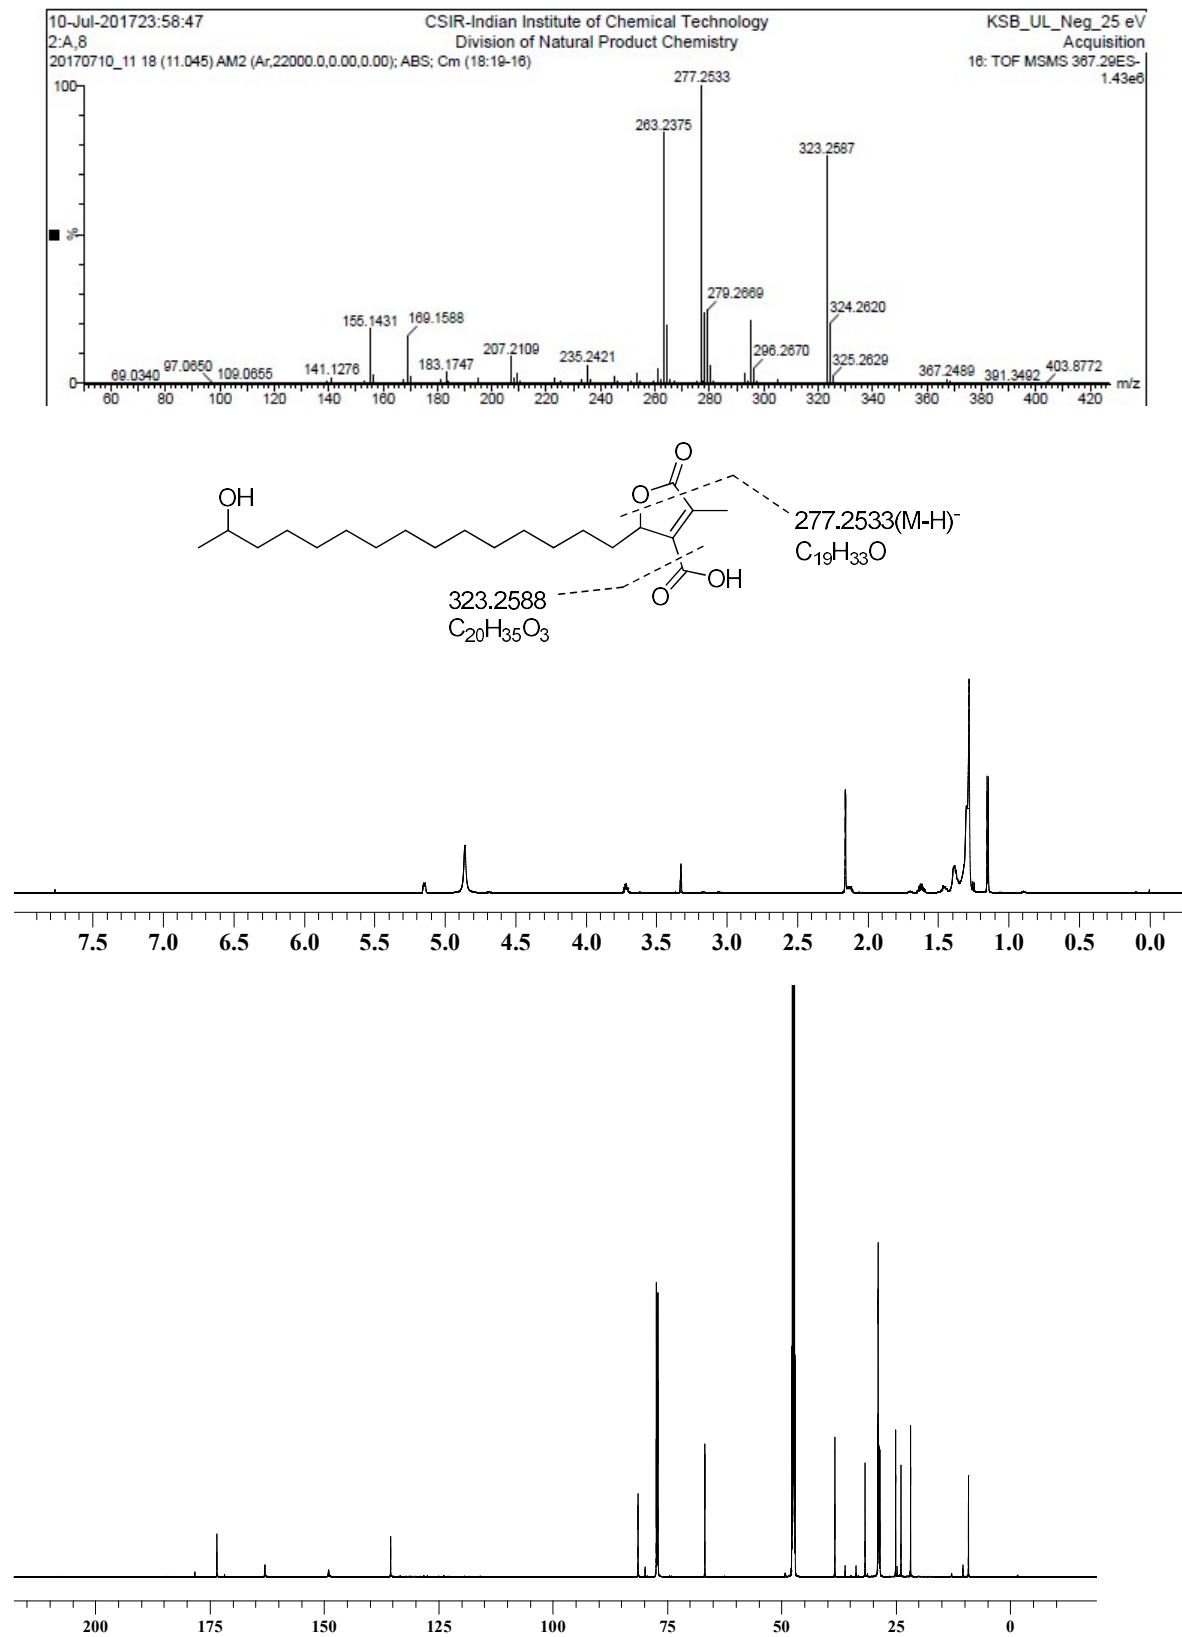

Figure S24. MS/MS spectrum, proposed fragmentation and  $^1H$  &  $^{13}C$  NMR of compound **20**

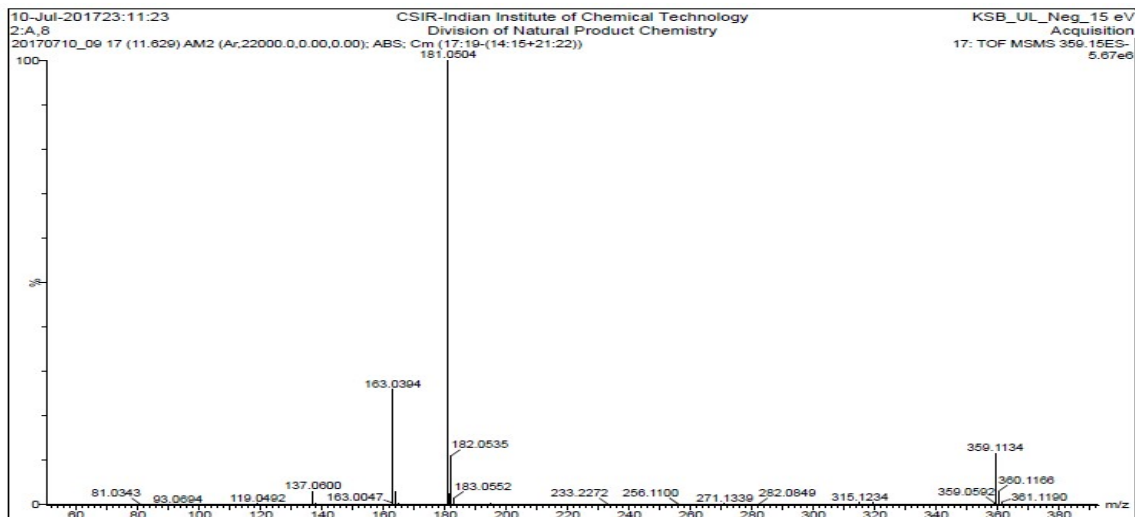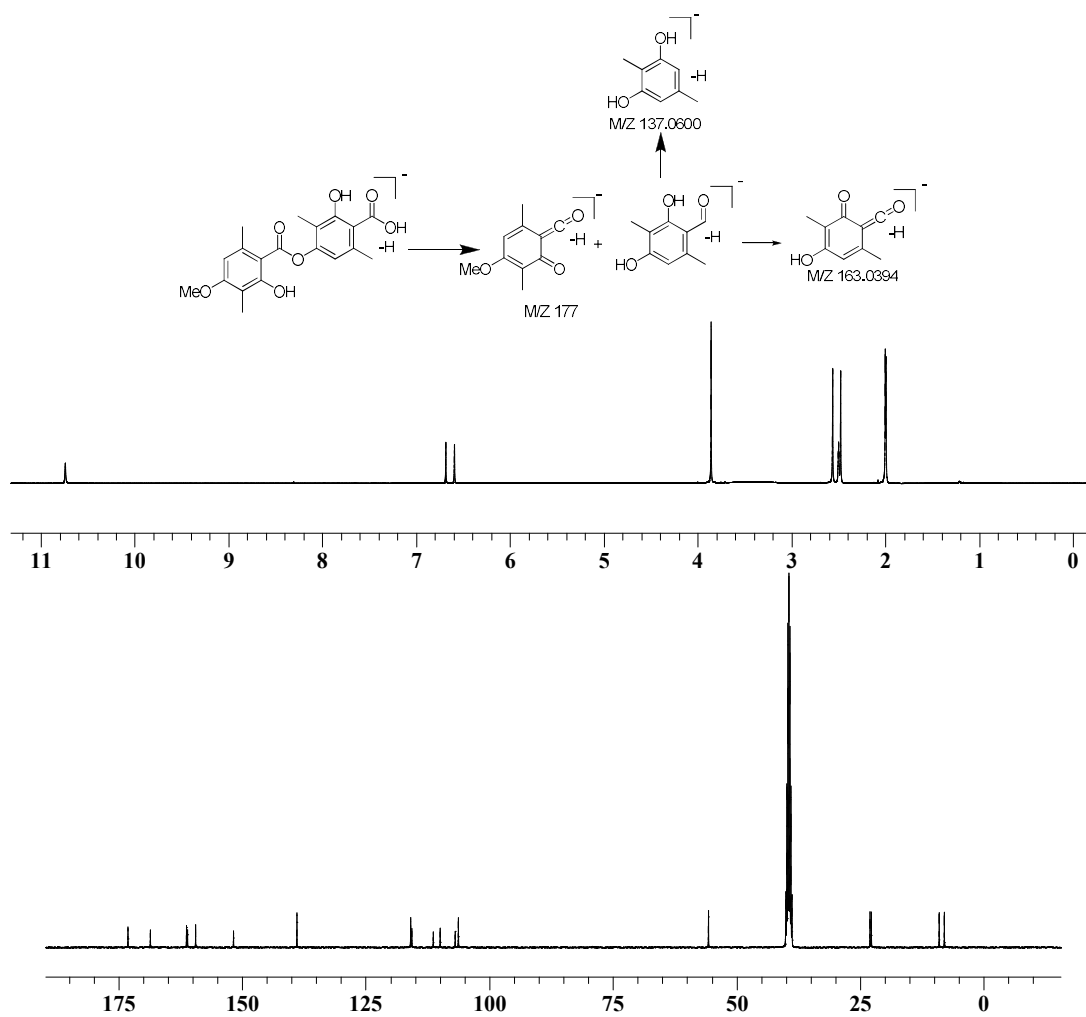

Figure S25. MS/MS spectrum, proposed fragmentation and  $^1\text{H}$  &  $^{13}\text{C}$  NMR of compound 21

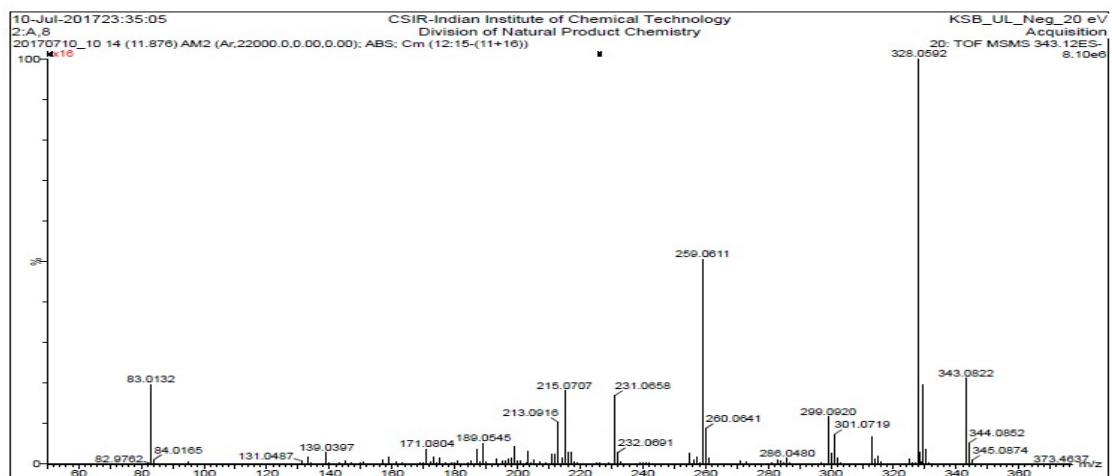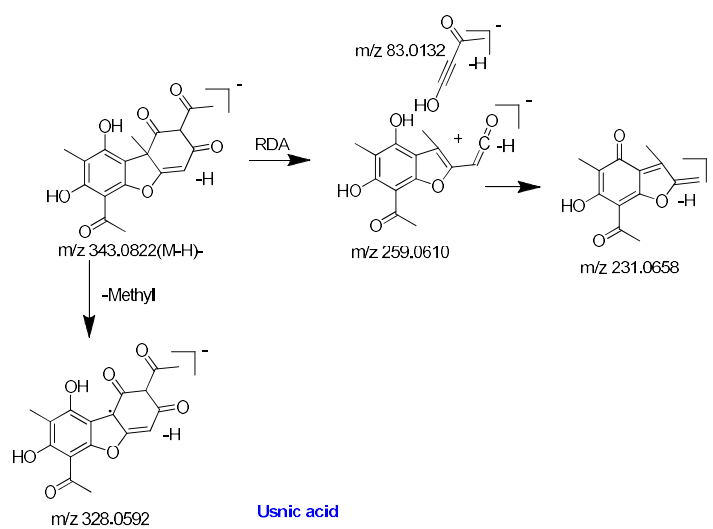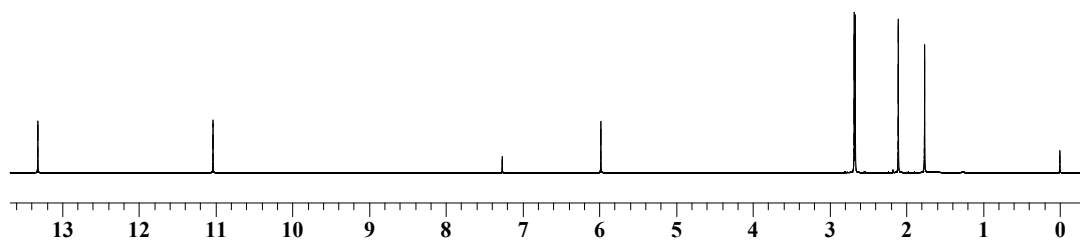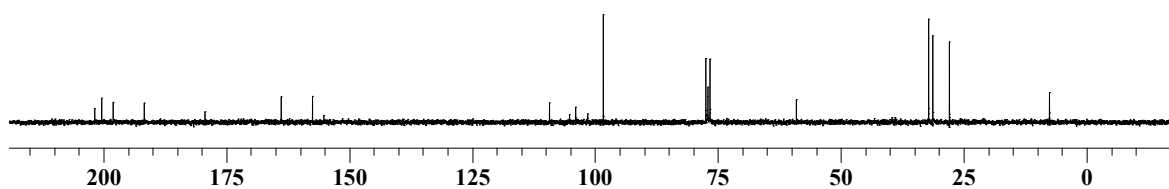

**Figure S26.** MS/MS spectrum, proposed fragmentation and  $^1H$  &  $^{13}C$  NMR of compound 22

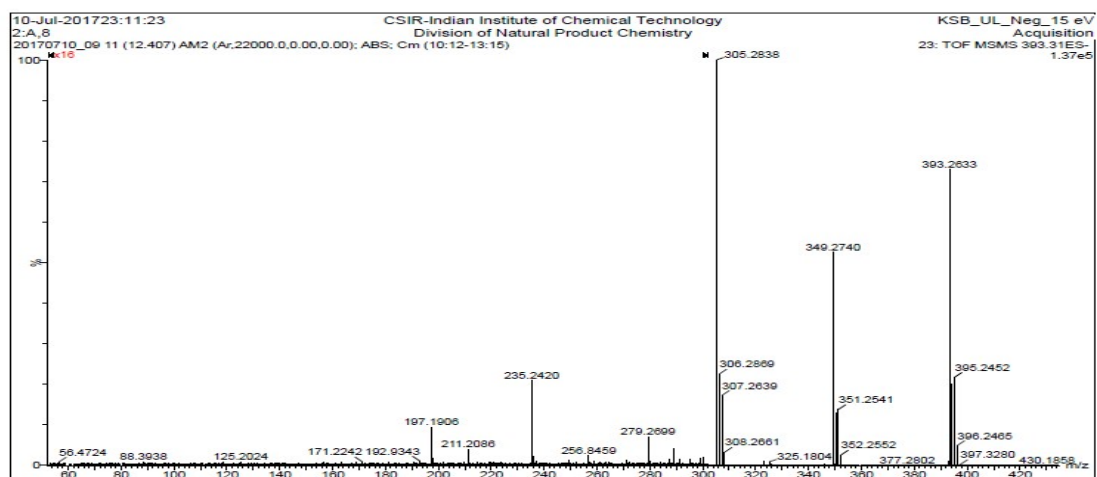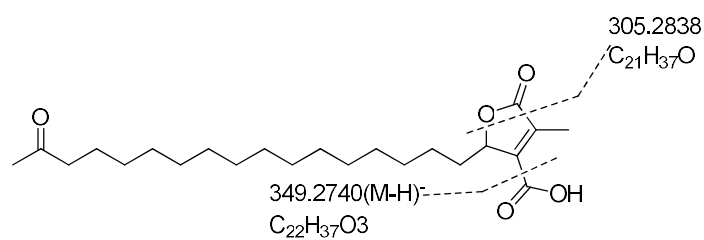

**Figure S27.** MS/MS spectrum and proposed fragmentation of compound **23**

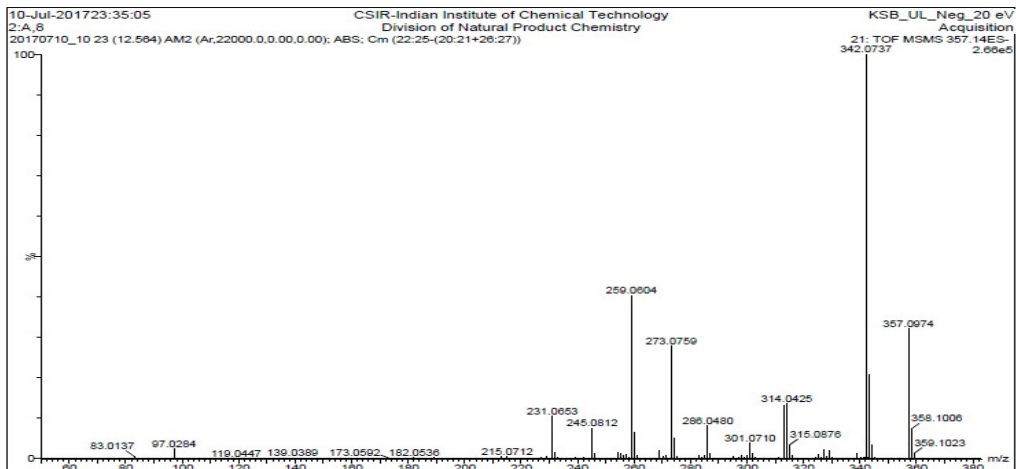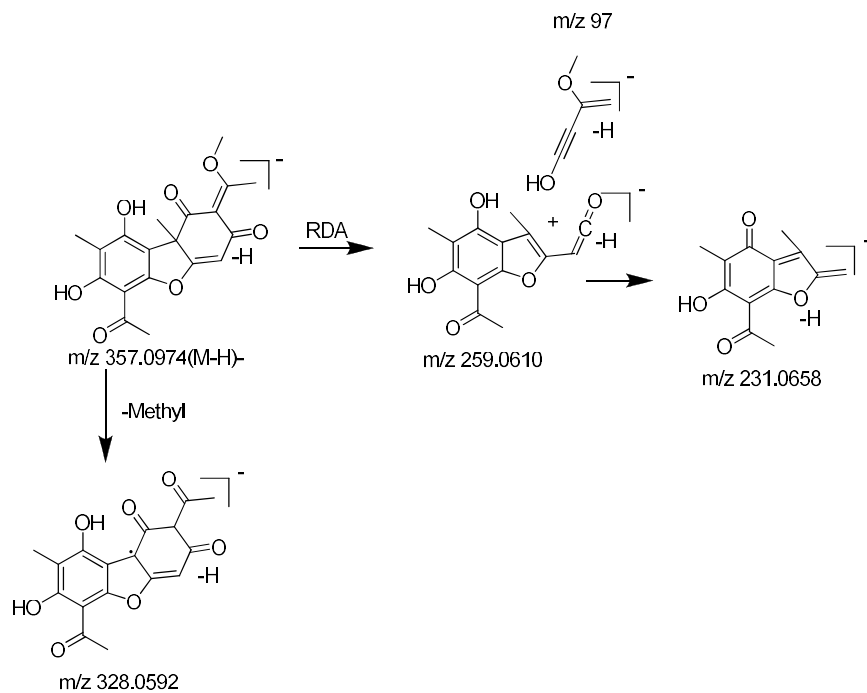

**Figure S28.** MS/MS spectrum and proposed fragmentation of compound **24**

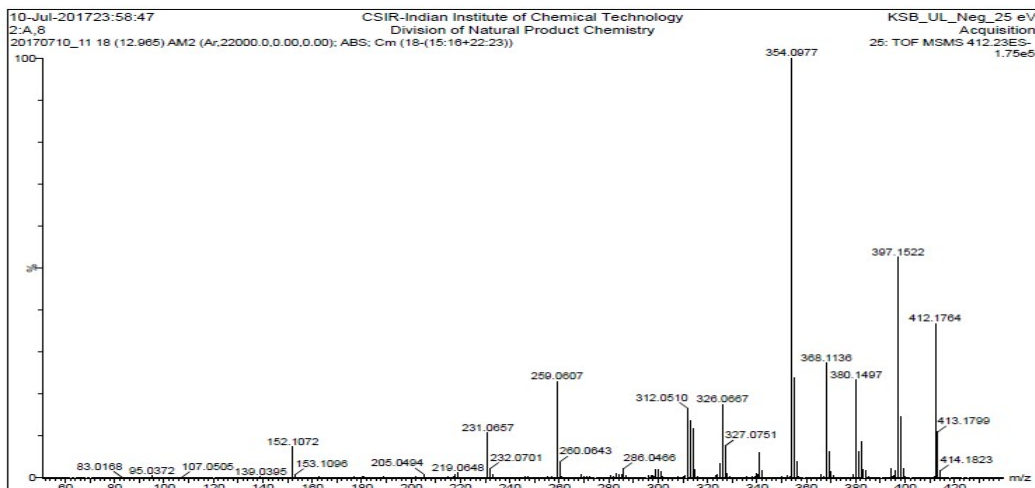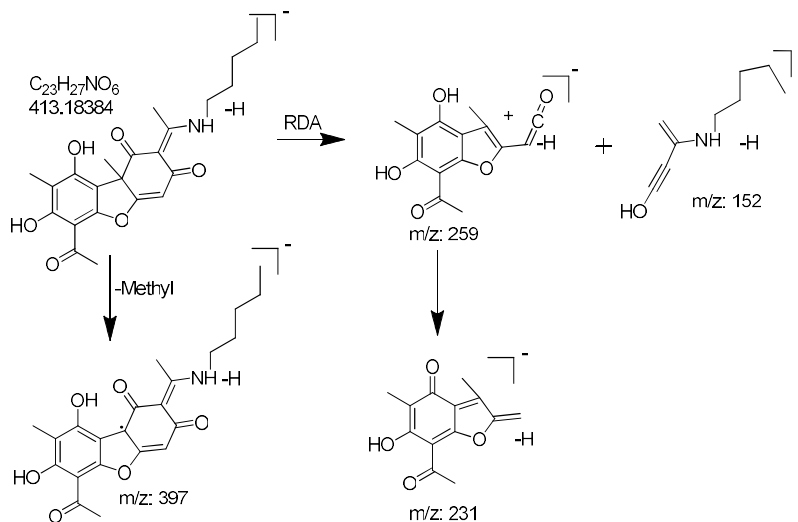

Figure S29. MS/MS spectrum and proposed fragmentation of compound 25

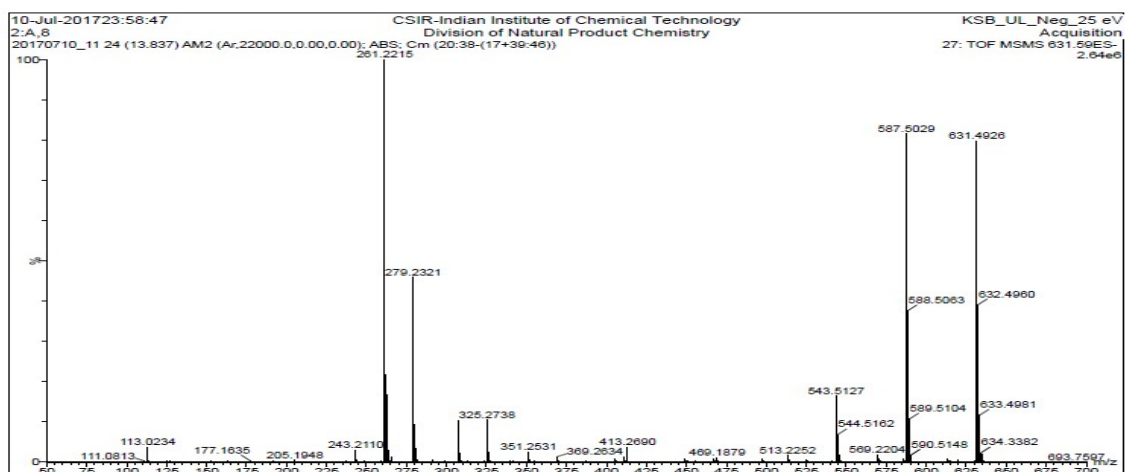

Figure S30. MS/MS spectrum of compound 26
